# Supplementary material
Source: PubMed Central journal article supplement (PMC4163622)

**A**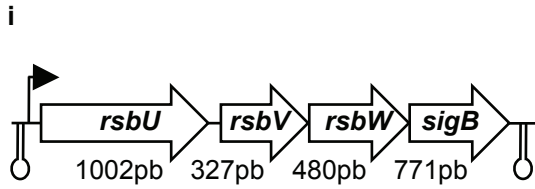**ii**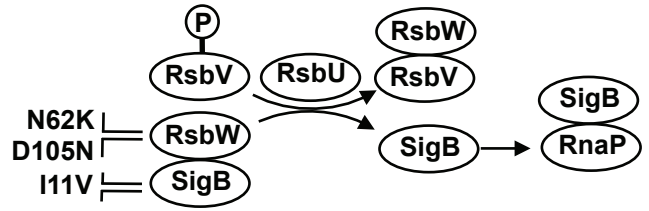**B**

|                             | G1-Box                 | ATP lid     | G2-Box           |
|-----------------------------|------------------------|-------------|------------------|
| <i>S. aureus</i>            | 80-IVISDKGDSFDYETTKSKI | GPYDKDENID  | FLREGGLGLFL-39   |
| <i>S. epidermidis</i>       | 80-IVISDQGESFDYEATKSHL | GPYNDNENID  | FLREGGLGLFL-39   |
| <i>B. lincheniformis</i>    | 79-IVVADQGDSFDIQDKQKEL | GPYSPEHTVD  | QDQLEGGGLGLFL-41 |
| <i>B. subtilis</i>          | 79-VIVADEGDSFDQKQQLD   | GPYTPSHTVD  | QDQLEGGGLGLYL-41 |
| <i>B. pumilus</i>           | 79-IIVADKGGSFDFKQKQED  | LGPYTTAHTVD | QDQLEGGGLGLYL-41 |
| <i>B. amyloliquefaciens</i> | 79-VIVADQGDSFDQKQQLD   | GPYTPSHTVD  | QDQLEGGGLGLYL-41 |

**D**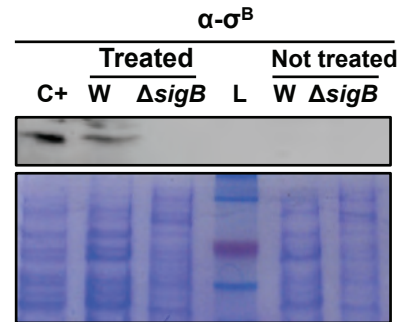**C**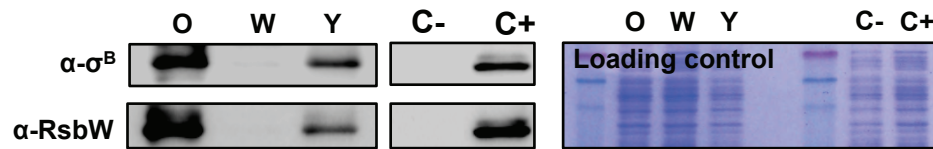**E**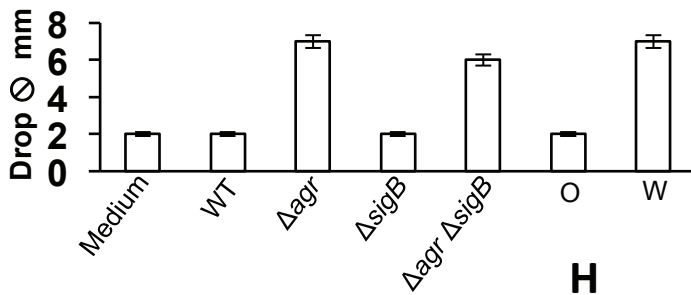**F**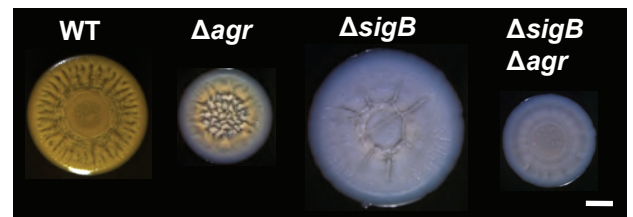**G**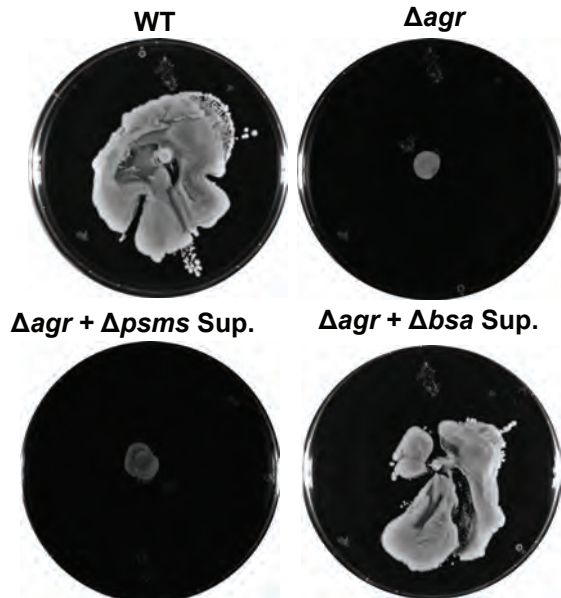**H**

$\Delta sigB$  op + operon O (C+)     $\Delta sigB$  op (C-)  
 $\Delta sigB$  op + operon W (W)     $\Delta sigB$  op + operon  $W_{m1}$  ( $W_{m1}$ )

Staphyloxanthin

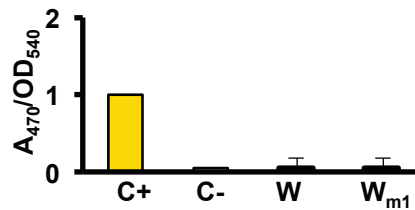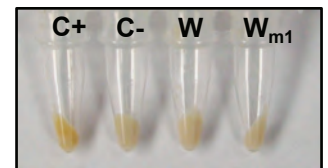

Spreading

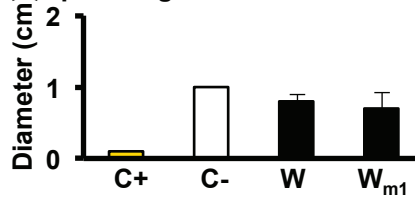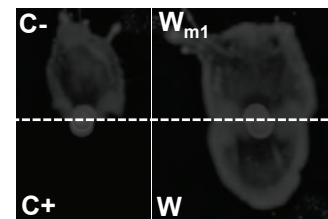

Hemolysis

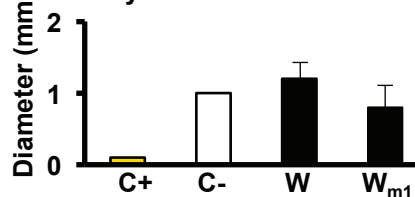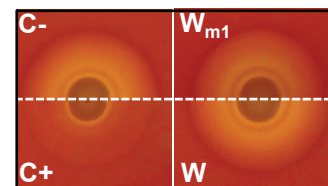

Supplement: NIHMS60204-supplement-S4.pdf [file NIHMS60204-supplement-S4.pdf]
