# Supplementary material
Source: PubMed Central journal article supplement (PMC4163622)
Supplement: NIHMS60204-supplement-1.pdf [file NIHMS60204-supplement-1.pdf]

1           **Supplemental Information Inventory**

2   Title: Evolution of resistance to a last-resort antibiotic in *Staphylococcus aureus* via bacterial  
3 competition

4   Authors: Gudrun Koch, Ana Yepes, Konrad U. Förstner, Charlotte Wermser, Stephanie T.  
5 Stengel, Jennifer Modamio, Knut Ohlsen, Kevin R. Foster and Daniel Lopez

6       Supplemental Information of this manuscript contains:

7       - 7 Supplemental figures (from S1 to S7)

8           Supplemental figure 1: In relation to main figure 1.

9           Supplemental figure 2: In relation to main figure 1.

10          Supplemental figure 3: In relation to main figures 2 and 3.

11          Supplemental figure 4: In relation to main figure 3.

12          Supplemental figure 5: In relation to main figures 4 and 5.

13          Supplemental figure 6: In relation to main figures 5, 6 and 7.

14          Supplemental figure 7: In relation to main figure 5 and 7.

15       - 7 Supplemental tables (from S1 to S7)

16           Supplemental table S1: In relation to main figures 1 to 7.

17           Supplemental table S2: In relation to main figures 1, 3, 4, 5, and 7.

18           Supplemental table S3: In relation to main figure 2.

19           Supplemental table S4: In relation to main figures 2 and 4.

20           Supplemental table S5: In relation to main figures 2 and 5.

21           Supplemental table S6: In relation to main figure 5.

22           Supplemental table S7: In relation to main figures 6 and 7.

23       - An extended section of Experimental Procedures: In relation to the section of  
24 Experimental Procedures of the main text.

25       - A section of Supplemental references: In relation to the main References section.

26

27 **Supplemental Information**

28 **Supplemental Figure Legends**

29 **Supplemental Figure S1 (Related to main figure 1): *Staphylococcus aureus* develops**  
30 **robust multicellular aggregates in magnesium-supplemented growth medium (TSBMg**  
31 **medium). (A)** Top-view pictures showing the progression of *S. aureus* microbial communities  
32 when they grow in TSB and TSBMg growth media. The microbial communities were incubated at  
33 37°C for five days. Scale bar is 1 mm. **(B)** (i) *S. aureus* growing in TSBMg medium developed  
34 robust microbial aggregates and their dispersion resulted only with the assistance of blunt  
35 objects (ii) Agr and SigB influence biofilm formation in *S. aureus* and antagonistically influence  
36 the architecture of the microbial communities. (iii) Diversified communities of *S. aureus* are  
37 robust communities. The dispersion of the microbial aggregates resulted only with the assistance  
38 of blunt objects. Scale bar is 1 mm. **(C)** Multicellular aggregates of different staphylococcal  
39 strains grown in TSBMg medium at 37°C during five days. It is possible to visualize the  
40 expansion of discrete sectors in several strains. Scale bar is 1 mm. **(D)** Top-view pictures  
41 showing the development of three independent diversification experiments of the multi-drug  
42 resistance CA-MRSA (Sc01 derivate) strain. The strains were grown TSBMg medium at 37°C  
43 during five days. Scale bar is 1 mm. **(E)** Strain diversification occurred in magnesium-  
44 supplemented growth medium (TSBMg) and not in other tested growth media. Colonies were  
45 grown for five days at 37°C. TSB+ Sheep Blood 5% medium (Hebert and Hancock, 1985), TSB +  
46 Horse serum 10% (Orth et al., 1971) and Brain-Heart Infusion medium (Yoshida et al., 1969).  
47 These growth media are routinely used to recreate acute staphylococcal infections in laboratory  
48 conditions. TSB+NaCl 500Mm+glucose 0.5% medium is conventionally used to recreate  
49 staphylococcal biofilm formation in laboratory conditions (i.e. chronic infections) (Beenken et al.,  
50 2003; Gotz, 2002). Synthetic nasal medium is used to recreate nasal colonization of  
51 *staphylococcus aureus*, in which *S. aureus* is not virulent (Krismer et al., 2014). We also tested

52 diverse growth media in which TSB was supplemented with several cations different from  $Mg^{2+}$ .  
53 The frequency of W and Y strain diversification was tested after five days of incubation. Samples  
54 were dilution plated and examined for colony heterogeneity based on differences in  
55 pigmentation. To test the occurrence of VISA-like phenotypes, 88 colonies were randomly  
56 selected and grown in liquid TSB medium conditioned with vancomycin 4  $\mu\text{g/ml}$  (See figure S2).  
57 Results are shown on the left side of the pictures. Scale bar is 1 mm.

58  
59 **Supplemental Figure S2 (Related to main figure 1): Diversification of W and Y strains in**  
60 **TSBMg medium. (A)** Quantification of the frequency of W and Y strains at different time points  
61 during the course of a diversification experiment. We assayed biofilm formation on solid agar and  
62 liquid culture using TSB and TSBMg media. We took samples at different time points during  
63 growth. Samples were dilution plated and examined for colony heterogeneity based on  
64 differences in the pigmentation of the resultant colonies. To perform these experiments, the  
65 inoculum was plated directly from the stock glycerol and incubated in TSB agar for 12h at 37°C.  
66 A sample of the inoculum was also examined for colony heterogeneity. (i) Panel shows a sector  
67 of the dilution plate experiments at different incubation time points until reaching five days  
68 incubation period (three days for liquid cultures). (ii) 88 colonies were randomly selected at each  
69 time point and tested for intermediate-resistance to vancomycin by allowing them to grow in  
70 liquid TSB cultures in the presence of vancomycin 4  $\mu\text{g/ml}$ . ii panel shows the 96-well plate of the  
71 last time point (120h for agar cultures and 72h for liquid cultures). The upper row of the well plate  
72 contains several controls. O, W and Y strains grew in triplicate. Only Y grew in the presence of  
73 vancomycin. An extra well with no inoculation (-) was placed to control growth contamination.  
74 The VISA strain (Mu50) grew in the two last wells as a positive control (+). (iii) Quantitative  
75 analysis of strain diversification based on the results of the assays that are shown in i and ii  
76 panels. **(B)** qRT-PCR analysis of the expression of staphyloxanthin production (*crt* gene), biofilm  
77 formation (*ica* and *spa* genes) and hemolytic toxins (*hla* gene) in O, W and Y strains obtained

78 from solid agar biofilm formation assay and liquid biofilm formation assay. *rpoZ* is used as control  
79 gene expression to normalize results.

80

81 **Supplemental Figure S3 (Related to main figure 2 and 3): (A) Correlation of genome-wide**  
82 **gene expression levels quantified by RNA-seq.** Left panel correlates expression levels of O to

83 W strains. Centre panel correlates expression levels of O to Y strains. Right panel shows  
84 quantification of the functional classification of over- and under-expressed genes of W in relation

85 to O strain (upper and bottom bars of the panel, respectively). Functional classification is MOB:

86 Mobile and extrachromosomal element functions, COF: Biosynthesis of cofactors, prosthetic  
87 groups, and carriers, AMI: Amino acid biosynthesis. PUR: Purines, pyrimidines, nucleosides, and

88 nucleotides, DNA: DNA metabolism, FAT: Protein fate, CEL: Cellular processes, ENE: Energy  
89 metabolism, REG: Regulatory functions, SIG: Signal transduction, HYP: Hypothetical proteins,

90 TRA: Transport and binding proteins ENV: Cell envelope, UNK: Unknown function. **(B)** Read  
91 coverage of 3 control genes in comparative RNA-seq in H, W and Y transcriptomic data. i, ii and

92 iii panels present the expression level of 5S rRNA, SAUSA300\_0777(cold-shock protein) and  
93 *gmk-rpoZ* operon (guanilate kinase, essential for recycling GMP). **(C)** Generation of a *Bacillus*

94 *subtilis* transducer strain that senses AIP signal from *S. aureus*. The transducer strain was  
95 generated using the signaling transduction pathway that triggers the differentiation of the

96 subpopulation of surfactin producers in *B. subtilis* (Lopez et al., 2009; Nakano et al., 1991). The  
97 self-produced pheromone signal ComX is sensed by the sensor kinase ComP and this, in turn,

98 triggers the ComA bistable switch, which ultimately leads to the activation of surfactin expression  
99 in only a fraction of cells (Lopez et al., 2009; Magnuson et al., 1994). Fluorescence microscopy

100 analysis evidenced that the fluorescence signal of a strain labeled with a transcriptional reported  
101 for surfactin expression ( $P_{srf}yfp$ ) was activated in only a subpopulation of cells. This

102 fluorescence signal was dependent on the extracellular presence of ComX because the

103 expression of the fluorescence reporter was not detected in the  $\Delta comX P_{srf-yfp}$  strain. Scale bar  
104 is 10  $\mu m$ . **(D)** We used the  $\Delta comX P_{srf-yfp}$  strain to replace the ComP sensor kinase by a  
105 chimeric kinase that contains the sensor domain of AgrC and the kinase domain of ComP  
106 kinases. A strain of *B. subtilis* harboring this chimeric kinase is able to detect the presence of the  
107 staphylococcal pheromone AIP in the extracellular milieu and respond to it by activating the  
108 differentiation pathway of surfactin producers. **(E)** Calibration of the transducer strain in response  
109 to different concentrations of AIP signal using fluorescence microscopy. Control with no AIP  
110 added to the cells represents the fluorescence background. Scale bar is 4  $\mu m$ . AIP was  
111 previously purified according to the methodology published in (P et al., 2001). **(F)** Calibration of  
112 the transducer strain in response to different concentrations of AIP signal using flow cytometry  
113 (n=50,000). The grey profile shows control with no AIP added to the cells. **(G)** Fluorescence  
114 microscopy field of a culture of the transducer strain in the presence of AIP (dilution 1:10). The  
115 size of the subpopulation of surfactin producers differentiates in a direct function to the  
116 concentration of AIP in the extracellular milieu. Scale bar is 10  $\mu m$ .

117

118 **Supplemental Figure S4 (Related to main figure 3): The W strain showed low SigB activity.**

119 **(A)** (i) Scheme of the four-gene long *rsbU-sigB* operon of *S. aureus*. (ii) RsbW sequesters  $\sigma^B$  and  
120 prevents it from binding to the RNA polymerase. In this state, the kinase activity of RsbW  
121 phosphorylates and inactivates RsbV. The active, dephosphorylated form of RsbV attacks the  
122 RsbW- $\sigma^B$  complex to liberate  $\sigma^B$  (Miyazaki et al., 1999; Palma and Cheung, 2001). Mutations in  
123 *rsbW* and  $\sigma^B$  detected in W strains are detailed. **(B)** Sequence alignment of the active site of the  
124 RsbW from different bacterial species. G1 and G2 boxes are conserved motifs in all ATPases  
125 and histidine kinases. The final side of the ATP binding pocket couples ATP binding to function-  
126 specific interdomain associations. The integrity of this region is essential for the binding and the  
127 phosphorylative activity of this enzyme (King-Scott et al., 2011). It is reported that mutations

128 similar to D105N identified in W strain are able to inactivate similar enzymes. A second mutation  
129 N62K was also found in some W strains but the region where the mutation localizes is not  
130 conserved in other RsbW proteins and therefore, the functionality of this region is unknown. **(C)**  
131 Western blot analysis comparing the expression of SigB and RsbW proteins in W cell extracts of  
132 O, W and Y strains using antibodies against SigB and RsbW. C- are the  $\Delta sigB$  and  $\Delta rsbU$   
133 defective mutants, respectively. C+ is a wild type strain in both experiments. SDS-PAGE are  
134 shown as loading control. **(D)** Western blot analysis to detect production of SigB and RsbW  
135 proteins in W cells previously treated and untreated with a protease inhibitor cocktail (Abcam®).  
136 Treatment with protease inhibitors partially recovered the detection of SigB and RsbW. This is  
137 consistent with the detection of transcription of the *sigB* operon that was detected in W strains  
138 (See Table S4). Antibodies against SigB were used for protein detection. SDS-PAGE is shown  
139 as loading control. **(E)** Semi-quantitative drop-collapse assay monitoring the concentration of  
140 surfactants in the supernatants of distinct genetic backgrounds. Drop diameter represents drop  
141 collapse (y axis) in control LB medium and WT,  $\Delta agr$ ,  $\Delta sigB$  and  $\Delta agr \Delta sigB$  supernatants,  
142 respectively. **(F)** Growth expansion of Muticellular communities of distinct strains in TSBMg for  
143 five days at 37°C. The absence of *agr* prevents expansion. **(G)** The mutation detected in the  
144 *rsbU-sigB* operon of W strain is responsible for the acquisition of a *sigB*-defective phenotype. A  
145 SigB-deficient laboratory strain of *S. aureus* was complemented with the *rsbU-sigB* operon from  
146 the O strain and W strains isolated from *in vitro* and *in vivo* experiments. The recovery of SigB  
147 activity was measured in the resultant strains by monitoring staphyloxanthin production (Giachino  
148 et al., 2001; Wieland et al., 1994), spreading (Tsompanidou et al., 2013; Tsompanidou et al.,  
149 2011) and hemolytic activity (Herbert et al., 2010). **(H)** Complementation with the *rsbU-sigB*  
150 operon from the O strain restored pigmentation and reduced the spreading and the hemolytic  
151 activities in the SigB-deficient laboratory strain of *S. aureus*. However, complementation with the  
152 *rsbU-sigB* operon from the W strains did not recovered staphyloxanthin production or reduced  
153 the spreading and the hemolytic activity. Left column contains quantitative data of the assays

154 that were performed. Right column contains the battery of physiological assays that were  
155 performed and the particular behavior of each one of the strains tested.

156

157 **Supplemental Figure S5 (Related to main figure 4 and 5): (A) VISA isolates do not have**  
158 ***bsa* gene cluster.** MAUVE alignment of the genomic regions that contains the *bsa* gene cluster  
159 in VISA and VSSA *Staphylococcus aureus* isolates. The reference strain for VSSA is LAC (top of  
160 the panel). VISA isolates are JH1, JH9, Mu3 and Mu50 strains (this is the group of VISA isolates  
161 with published genome sequences). We performed a non-progressive alignment using default  
162 parameters with a seed-weight of 19. **(B)** Alignment of the whole genome sequences of 37 *S.*  
163 *aureus* strains. The progressive alignment is represented in a guide tree that compares the level  
164 of nucleotide similarity between genomes. A blue sector contains the region of the guide tree  
165 with the group of VISA strains. A red sector contains the region of the guide tree with the  
166 genomes of the strains that contains the *bsa* cluster. **(C)** Emergence of VISA-like strains from  
167 Bsa+/Bsa- mixed communities. 1:1 mixtures of LAC/N315 (Bsa+/Bsa-) and LACΔ*bsa*/N315  
168 (control Bsa-/Bsa-) were incubated for five days in TSB medium. After incubation, samples were  
169 dilution plated in TSB agar medium supplemented with vancomycin 4 μg/ml. The colonies that  
170 were able to grow in the presence of vancomycin were analyzed by PCR-amplification of the  
171 *bsaA* gene or the chloramphenicol resistance cassette in the case of the LACΔ*bsa* strain. We  
172 detected ≤ 1% of colonies rising on the plates supplemented with vancomycin. This effect occurs  
173 in all strains tested and is attributed to the selective pressure on cells to become resistant to the  
174 vancomycin in the selection plates, which leads to the possibility of producing false positives.  
175 Therefore, this ≤ 1% of rising colonies was considered as background. **(D)** Subtle expression  
176 changes in VISA strains. Read coverage of the transcription profile of several VISA-related  
177 genes in Y strain and the parental O strain. *ssaA* encodes for an autolysin, *dltA* and *murZ* is  
178 related to cell wall metabolism. **(E)** The mutations identified in the *vraRS*, *graRS* and *walkR*  
179 operons of the Y strains confer a VISA-like phenotype. We complemented a laboratory strain of

180 *S. aureus* with the *vraRS*, *graRS* or *walkR* operons from the O strain or Y strains obtained from  
181 *in vitro* and *in vivo* experiments. The acquisition of the VISA-like phenotype was monitored by  
182 measuring the ability of the resultant strains to grow in the presence of vancomycin 4 µg/ml.  
183 Strains complemented with the operons from the O strain did not acquire intermediate resistance  
184 to vancomycin. However, the strains complemented with the operons from the Y strains resulted  
185 in the acquisition of a VISA-like phenotype.

186

187 **Supplemental Figure S6 (Related to main figure 5, 6 and 7): Schematic representation of**  
188 **the single-nucleotide point (SNP) mutations that confer a SigB-defective phenotype and**  
189 **VISA phenotype to *S. aureus*. (A)** Schematic representation of the SNP mutations that confer a  
190 SigB-defective phenotype to *S. aureus*. The SNPs that are represented in black and located on  
191 the upper side of the operon scheme are those found in clinical isolates and reported in the  
192 literature to confer a SigB-defective phenotype to *S. aureus*. (Herbert et al., 2010; Inose et al.,  
193 2006; Karlsson-Kanth et al., 2006; McAdam et al., 2011; Savage et al., 2013). The SNPs that  
194 were detected in our study are represented on the bottom side of the operon scheme. They are  
195 colored in red if they were detected in *in vitro* experiment. They are colored in blue if they were  
196 detected in *in vivo* experiments. The SNPs that were identified in this work and already reported  
197 to confer a SigB-defective phenotype to *S. aureus* are highlighted with a colored frame. **(B)**  
198 Schematic representation of the SNPs mutations that confer a VISA phenotype to *S. aureus*. The  
199 *GraRS*, *VraRS* and *WalkR* operons are represented. The black-colored SNPs displayed on the  
200 upper side of the operon scheme are those reported in the literature to confer a VISA phenotype  
201 to *S. aureus*. (Hafer et al., 2012). The SNPs that were detected in our study are represented on  
202 the bottom side of the operon scheme. They are colored in red if they were detected in the  
203 diversification experiment *in vitro*. They are colored in blue if they were detected *in vivo*. They are  
204 colored in green if they were identified in the *in vitro* experiments of artificial mixtures or



205 exogenous addition of Bsa. The SNPs that were identified in this work and already reported to  
206 confer a VISA-phenotype are highlighted with a colored frame.

207

208 **Supplemental Figure S7 (Related to main figure 5 and 7): Mechanism for acquisition of**

209 **intermediate resistance to vancomycin of VISA strains. (A)** Vancomycin inhibits bacterial cell

210 wall synthesis by forming stable complexes with the C-terminal D-Ala-D-Ala residues of the Lipid

211 II-linked pentapeptide cell wall precursors in the nascent peptidoglycan (henceforth, simply

212 referred to as Lipid-II-AA). This blocks the access of the penicillin-binding proteins to their

213 substrates, which causes an inhibition of peptidoglycan crosslinking and thus, cell wall

214 biosynthesis (detail 1). Hence, Lipid-II-AA is the lethal target of vancomycin, which is positioned

215 at the tip of the division septum. Thus, cell wall synthesis in *S. aureus* exclusively occurs at the

216 division septum and not throughout the whole-cell wall (detail 2). This means that vancomycin

217 has to diffuse to the tip of the division septum to bind to Lipid-II-AA and inhibit cell wall synthesis

218 (detail 2). However, VISA strains show a thicker cell wall, which prevents the diffusion of

219 vancomycin to its site of action at the division septum and therefore, decreases the potency of

220 the drug. The thicker cell wall of VISA strains provides a barrier against vancomycin diffusion

221 using several blocking mechanisms (detail 3). First, the increase in cell wall thickness physically

222 hinders the penetration of vancomycin (Hiramatsu, 2001; Touhami et al., 2004). Second, the

223 thickened cell wall of VISA strains contains reduced crosslinking of peptidoglycan strands. This

224 increases the number of free D-Ala-D-Ala residues in the cell wall (Hiramatsu, 2001; Sieradzki et

225 al., 1999; Sieradzki and Tomasz, 2003), which are nonlethal binding sites for vancomycin, since

226 they do not participate in cell wall synthesis. These are able to retain vancomycin in the cell wall

227 and impede the penetration of the antibiotic to the division septum (Pereira et al., 2007). Third,

228 VISA strains showed reduced rates of autolysis and cell wall turnover, which reduces the number

229 of lethal targets of vancomycin (Cafiso et al., 2012; Cui et al., 2010). Fourth, VISA strains

230 contained an increased number of positive charges in the cell wall (Cui et al., 2010; Mishra et al.,

231 2009). This is due to the overexpression of the *dlt* operon, which is responsible for the D-alanyl<sup>+</sup>  
232 esterification of the teichoic acids at the cell wall (Cao and Helmann, 2004; Perego et al., 1995).  
233 Positive charges in the cell wall repel the binding of positively charged antimicrobial peptides,  
234 such as vancomycin. Altogether, a model of intermediate resistance to vancomycin, commonly  
235 referred to as “drug capture” (Sieradzki et al., 1999) or “clogging phenomenon” (Krismer et al.,  
236 2014), has been proposed for VISA strains. The barrier to the diffusion of vancomycin provided  
237 by a thickened cell wall prevents the binding of the antibiotic to its lethal target Lipid-II-AA at the  
238 division septum, leading to the accumulation of vancomycin at the cell wall, where its action does  
239 not affect cell viability **(B)** Fluorescence microscopy analysis showing the accumulation of  
240 fluorescein-labeled vancomycin after diffusing through the cell wall of *S. aureus*. Fluorescein-  
241 labeled vancomycin is referred to as Van-FL. The fluorescence signal is false-colored in green.  
242 Left column shows the specific binding of Van-FL to the lethal target Lipid-II-AA. We have used  
243 the method described by (Pereira et al., 2007) in which cells are grown to mid-exponential phase  
244 in the presence of D-serine, leading to incorporation of this amino acid as the C-terminal residue  
245 of the peptidoglycan muropeptides (Grohs et al., 2000; van Wageningen A, 1998). This leads to  
246 a cell wall that is crosslinked with peptides containing D-Ala-D-Ser residues instead of D-Ala-D-  
247 Ala, for which vancomycin has very low affinity. Subsequent growth in the presence of D-Ala for  
248 15 min leads to the incorporation of this amino acid primarily into Lipid-II-AA and newly  
249 synthesized and uncrosslinked chains of the peptidoglycan. Cells were then labeled with Van-FL,  
250 which binds only the D-Ala-D-Ala-containing peptidoglycan, allowing the visualization of the new  
251 cell wall synthesis sites. The fluorescence signal exclusively localizes at the division septum. Cell  
252 membranes have been stained with Nile red for better visualization (false colored in red). Scale  
253 bar is 1  $\mu$ m. Right column shows the phenomenon of “drug capture” or “clogging phenomenon”  
254 of vancomycin in *S. aureus* cells. Exponentially growing cells were treated with non-fluorescent  
255 vancomycin (3  $\mu$ g/ml) for 1 h before a quick exposure to an excess of Van-FL. Quick staining  
256 with Van-FL enables the visualization of vancomycin accumulation at the cell wall and not at the

257 division septum. Cell membranes have been stained with Nile red for better visualization (false  
 258 colored in red). Scale bar is 1  $\mu\text{m}$  **(C)** Quantitative analysis of the diffusion of fluorescein-labeled  
 259 vancomycin through the cell wall of O, W and Y cells. This is a version of the protocol published  
 260 by (Pereira et al., 2007). A total of 100 cells from each strain were monitored and classified into 3  
 261 categories according to their rate of Van-FL incorporation. Category 1 (C1): Cells showed higher  
 262 fluorescent signal associated with the cell wall than with the septum. Category 2 (C2): Cells  
 263 showed a uniform distribution of the fluorescent signal in the cell wall and in the septum.  
 264 Category 3 (C3): Cells showed higher fluorescent signal associated with the septum than with  
 265 the cell wall. Control experiment compares the diffusion of Van-FL in two isogenic VSSA/VISA  
 266 strains (N315/Mu50). As expected, the VISA strain showed lower fluorescence signal associated  
 267 with the division septum and higher fluorescence signal retained in the cell wall. A similar effect  
 268 is observed in Y cells in comparison to O and W cells. Comparison analysis has been performed  
 269 using Leica Application Software Analysis and FiJi. **(D)** Electronic micrographs of O, W and Y  
 270 cells, providing evidence that Y cells contained a thicker cell wall. Media and mean deviation of  
 271 the cell wall thickness is shown in the top of each panel (in nanometers). Scale bars are 0.3  $\mu\text{M}$ .  
 272 **(D)** Cell wall thickness of several VISA strain in relation to their parental VSSA strains (Cui et al.,  
 273 2006; Howden et al., 2011; Reipert et al., 2003). Increase in cell wall thickness is approximately  
 274 1.4 fold.

275

## 276 **Supplementary Tables**

277 **Supplementary Table S1:** Strains and plasmids used in this study. Related to main figures 1-7.

|        |                                                                                                                                                          |                              |
|--------|----------------------------------------------------------------------------------------------------------------------------------------------------------|------------------------------|
| DL99   | <i>Escherichia coli</i> DH5 $\alpha$                                                                                                                     | (Reusch et al., 1986)        |
| DL2    | <i>Bacillus subtilis</i> 168                                                                                                                             | (Burkholder and Giles, 1947) |
| DL1    | <i>Bacillus subtilis</i> NCIB3610                                                                                                                        | (Branda et al., 2001)        |
| GK36   | <i>S. aureus</i> HG003 [Laboratory strain corrected for $\Delta$ 11-bp- <i>rsbU</i> deletion and <i>tcaR</i> mutation. The parental strains is NCTC8325] | (Herbert et al., 2010)       |
| DL1603 | <i>S. aureus</i> N315 [MRSA isolate from an airways infection (Japan)]                                                                                   | (Ito et al., 1999)           |

|        |                                                                                                                          |                                |
|--------|--------------------------------------------------------------------------------------------------------------------------|--------------------------------|
| DL1120 | <i>S. aureus</i> Newman [MSSA isolate from an osteomyelitis patient (UK)]                                                | (Lipinski et al., 1967)        |
| DL1217 | <i>S. aureus</i> RN4220 [Laboratory strain. The parental strains is NCTC8325]                                            | (Kornblum, 1990)               |
| GK141  | <i>S. aureus</i> LAC (TCH) [CA-MRSA isolate from a wrist abscess (USA)]                                                  | (McDougal et al., 2003)        |
| CW58   | <i>S. aureus</i> LAC (JE2) ) [CA-MRSA isolate from a wrist abscess (USA)] (This is a plasmid-cured strain)               | (Bae et al., 2004)             |
| DL1479 | <i>S. aureus</i> NewHG [Laboratory strain corrected for saeRS hyperactivation. The parental strains is Newman]           | (Mainiero et al., 2010)        |
| DL1125 | <i>S. aureus</i> COL ) [MRSA isolate from the air of a surgery room (UK)]                                                | (Dyke, 1969)                   |
| DL1122 | <i>S. aureus</i> Reynolds [MSSA isolate from a patient with bacteremia (USA)], Prototype serotype 5.                     | (Albus et al., 1991)           |
| DL1480 | <i>S. aureus</i> RN1 (also known as NCTC8325). [MRSA isolate from a patient with bacteremia (USA)]                       | (Novick, 1967)                 |
| DL1121 | <i>S. aureus</i> Becker [MSSA isolate from a patient with bacteremia (USA)]. Prototype serotype 8.                       | (Sau and Lee, 1996)            |
| DL1123 | <i>S. aureus</i> MN8 [MSSA isolate from a menstrual toxic-shock syndrome patient (USA)]                                  | (Yarwood and Schlievert, 2000) |
| DL1626 | <i>S. aureus</i> 2330 [MRSA isolate from a patient with bacteremia (Germany)]                                            | (Sader et al., 2006)           |
| DL1127 | <i>S. aureus</i> UAMS-1 [MSSA isolate from an osteomyelitis patient (USA)]                                               | (Blevins et al., 2002)         |
| DL1353 | <i>S. aureus</i> SH1000 [Laboratory strain corrected for $\Delta$ 11-bp-rsbU deletion. Its parental strains is NCTC8325] | (Horsburgh et al., 2002)       |
| DL1607 | <i>S. aureus</i> MT01 [MSSA isolate from the nose of a healthy host (JAPAN)]                                             | (Tsai et al., 2011)            |
| DL1627 | <i>S. aureus</i> Mu50 [VISA strain isolated from a wound infection (Japan). Its parental strain is N315]                 | (Hiramatsu et al., 1997)       |
| DL1129 | <i>S. aureus</i> Sc-01) [CA-MRSA isolate from a hip wound infection (USA)]                                               | (Beenken et al., 2003)         |
| GK142  | <i>S. aureus</i> Sc-01 derivative (Y strain)                                                                             | This study                     |
| GK143  | <i>S. aureus</i> Sc-01 derivative (O strain)                                                                             | This study                     |
| GK144  | <i>S. aureus</i> Sc-01 derivative (W strain)                                                                             | This study                     |
| GK473  | <i>S. aureus</i> Sc-01 derivative (YA strain)                                                                            | This study                     |
| GK472  | <i>S. aureus</i> Sc-01 derivative (YB strain)                                                                            | This study                     |
| GK455  | <i>S. aureus</i> Sc-01 derivative (Om1 strain)                                                                           | This study                     |
| GK456  | <i>S. aureus</i> Sc-01 derivative (Om2 strain)                                                                           | This study                     |
| GK457  | <i>S. aureus</i> Sc-01 derivative (Om3 strain)                                                                           | This study                     |
| GK463  | <i>S. aureus</i> Sc-01 derivative (Wm1 strain)                                                                           | This study                     |

|        |                                                                                                                          |                       |
|--------|--------------------------------------------------------------------------------------------------------------------------|-----------------------|
| GK464  | <i>S. aureus</i> Sc-01 derivative (Wm2 strain)                                                                           | This study            |
| GK465  | <i>S. aureus</i> Sc-01 derivative (Wm3 strain)                                                                           | This study            |
| GK469  | <i>S. aureus</i> Sc-01 derivative (Ym1 strain)                                                                           | This study            |
| GK470  | <i>S. aureus</i> Sc-01 derivative (Ym2 strain)                                                                           | This study            |
| GK471  | <i>S. aureus</i> Sc-01 derivative (Ym3 strain)                                                                           | This study            |
| CW42   | <i>E. coli</i> DH5 $\alpha$ pMAD- $\Delta$ bsa::cm <sup>R</sup>                                                          | This study            |
| GK300  | <i>S. aureus</i> LAC $\Delta$ sigB::erm <sup>R</sup>                                                                     | This study            |
| GK540  | <i>S. aureus</i> Sc-01 $\Delta$ bsa::cm <sup>R</sup>                                                                     | This study            |
| DL1646 | <i>S. aureus</i> LAC $\Delta$ sigB::erm <sup>R</sup> $\Delta$ bsa::cm <sup>R</sup>                                       | This study            |
| JM36   | <i>E. coli</i> DH5 $\alpha$ pDR111- <i>agrC-comP</i>                                                                     | This study            |
| JM37   | <i>E. coli</i> DH5 $\alpha$ pDG1661-P <sub>HP</sub> <i>agrC-comP</i>                                                     | This study            |
| JM39   | <i>B. subtilis</i> pDG1661-P <sub>HP</sub> <i>agrC-comP</i>                                                              | This study            |
| DL720  | <i>B. subtilis</i> lacA::P <sub>srf</sub> -YFP                                                                           | (Lopez et al., 2009)  |
| JM8    | <i>B. subtilis</i> $\Delta$ comX::spc <sup>R</sup> ; lacA::P <sub>srf</sub> -YFP                                         | This study            |
| JM42   | <i>B. subtilis</i> $\Delta$ comX::spc <sup>R</sup><br>lacA::P <sub>srf</sub> -YFP amyE::P <sub>HP</sub> <i>agrC-comP</i> | This study            |
| DL1495 | <i>S. aureus</i> Newman $\Delta$ sigB::erm <sup>R</sup>                                                                  | This study            |
| DL1501 | <i>S. aureus</i> Newman $\Delta$ agr::tet <sup>R</sup>                                                                   | This study            |
| DL1699 | <i>S. aureus</i> Newman $\Delta$ sigB::erm <sup>R</sup> $\Delta$ agr::tet <sup>R</sup>                                   | This study            |
| DL1480 | <i>S. aureus</i> 4220 ( <i>graRS</i> O)                                                                                  | This study            |
| GK560  | <i>S. aureus</i> 4220 ( <i>graRS</i> Y)                                                                                  | This study            |
| GK562  | <i>S. aureus</i> 4220 ( <i>graRS</i> Ym)                                                                                 | This study            |
| GK562  | <i>S. aureus</i> 4220 ( <i>graRS</i> Ym)                                                                                 | This study            |
| GK569  | <i>S. aureus</i> 4220 ( <i>vraRS</i> O)                                                                                  | This study            |
| GK570  | <i>S. aureus</i> 4220 ( <i>vraRS</i> Y)                                                                                  | This study            |
| GK571  | <i>S. aureus</i> 4220 ( <i>vraRS</i> Ym)                                                                                 | This study            |
| GK572  | <i>S. aureus</i> 4220 ( <i>vraRS</i> Ym)                                                                                 | This study            |
| GK573  | <i>S. aureus</i> 4220 ( <i>rsbU-sigB</i> O)                                                                              | This study            |
| GK574  | <i>S. aureus</i> 4220 ( <i>rsbU-sigB</i> W)                                                                              | This study            |
| GK575  | <i>S. aureus</i> 4220 ( <i>rsbU-sigB</i> Wm)                                                                             | This study            |
| GK576  | <i>S. aureus</i> 4220 ( <i>walKR</i> O)                                                                                  | This study            |
| GK577  | <i>S. aureus</i> 4220 ( <i>walKR</i> Y)                                                                                  | This study            |
| GK580  | <i>S. aureus</i> 4220 ( <i>walKR</i> Ym)                                                                                 | This study            |
| GK581  | <i>S. aureus</i> 4220 ( <i>walKR</i> YA)                                                                                 | This study            |
| GK582  | <i>S. aureus</i> 4220 ( <i>walKR</i> YB)                                                                                 | This study            |
| GK583  | <i>S. aureus</i> 4220 $\Delta$ psm $\alpha$ $\Delta$ psm $\beta$                                                         | (Geiger et al., 2012) |

278

279 **Supplementary Table S2:** List of primers used in this study. Related to main figures 1, 3, 4, 5

280 and 7.

|                    |                                                   |
|--------------------|---------------------------------------------------|
| RT- <i>crtMF</i>   | 5'-TGATGACAGTATAGATGTTTATGG-3'                    |
| RT- <i>crtMR</i>   | 5'-ACATGCTGAAGCGCCATCATG-3'                       |
| RT- <i>icaBF</i>   | 5'-TTATCACAGGTCATGTTGGG-3'                        |
| RT- <i>icaBR</i>   | 5'-ATCGTCATTCATCAAGCCAT-3'                        |
| RT- <i>spaF</i>    | 5'-TGAATCTCAAGCACCGAAAG-3'                        |
| RT- <i>spaR</i>    | 5'-TTGCTCACTGAAGGATCGTC-3'                        |
| RT- <i>epiBF</i>   | 5'-ACTGAAATTGGATTTGGCGAGG-3'                      |
| RT- <i>epiBR</i>   | 5'-AGCCACAATAAGTACGCTGCT-3'                       |
| RT- <i>hlaF2</i>   | 5'-CAACAACACTATTGCTAGGTTCCATATT-3'                |
| RT- <i>hlaR2</i>   | 5'-CCTGTTTTTACTGTAGTATTGCTTCCA-3'                 |
| RT- <i>hlfF2</i>   | 5'-TGAAGATGGTGGCGTAGCGATTGT-3'                    |
| RT- <i>hlfR2</i>   | 5'-TCATGTCCAGCACCAACGAGAA-3'                      |
| RT- <i>psmaF</i>   | 5'-TATCAAAAAGCTTAATCGAACAATTC-3'                  |
| RT- <i>psmaR</i>   | 5'-CCCCTTCAAATAAGATGTTTCATATC-3'                  |
| RT- <i>hldF</i>    | 5'-CCTAGATCACAGAGATGTGATGG-3'                     |
| RT- <i>hldR</i>    | 5'-AATACATAGCACTGAGTCCAAGG-3'                     |
| RT- <i>mprFF</i>   | 5'-GAACCACCGTTTTCAACTGAA-3'                       |
| RT- <i>mprFR</i>   | 5'-GTAAATCTAACTCTGGCAACCATC-3'                    |
| RT- <i>dltAF</i>   | 5'-ATGTTTAGCATCAGGCGGTAC-3'                       |
| RT- <i>dltAR</i>   | 5'-ACTTGGGAAACGGCTCACTAA-3'                       |
| RT- <i>cls2F</i>   | 5'-ACGCCCGTTTCGCAATAAAG-3'                        |
| RT- <i>cls2R</i>   | 5'-TGCGTATCTCGCCAATAGCC-3'                        |
| RT- <i>sgtBF</i>   | 5'-AATATACGCTTGAGGGCGCA-3'                        |
| RT- <i>sgtBR</i>   | 5'-TCGTGCTTACACGTTGCGTA-3'                        |
| RT- <i>murZF</i>   | 5'-TGTTGCACCTACGCTAACCAT-3'                       |
| RT- <i>murZR</i>   | 5'-TTACCGGGAGGATGTCCACT-3'                        |
| RT- <i>epiAF</i>   | 5'-TTCAGCAGGTGACGAACGTA-3'                        |
| RT- <i>epiAR</i>   | 5'-GCCCTTTCAGGCTCTATTTGC-3'                       |
| RT- <i>sle1F</i>   | 5'-AAGTATCTGGCTCAAGTAATTCTAC-3'                   |
| RT- <i>sle1R</i>   | 5'-ACTGGTACGTTCCAGAGGTCG-3'                       |
| RT- <i>ssaAF</i>   | 5'-GGCGGAGAAATCGGTTCTACT-3'                       |
| RT- <i>ssaAR</i>   | 5'-TACTGAGAAAGGTCCGCCAC-3'                        |
| RT- <i>RNAIIF</i>  | 5'-TATGAATAAATGCGCTGATGATATACCACG-3'              |
| RT- <i>RNAIIR</i>  | 5'-TTTTAAAGTTGATAGACCTAAACCACGACC-3'              |
| RT- <i>RNAIIIF</i> | 5'-CTAAGTCACCGATTGTTGAA-3'                        |
| RT- <i>RNAIIIR</i> | 5'-ATGGAAAATAGTTGATGAGTTG-3'                      |
| GK118              | 5'-CGTTTTAACCGAAATTTAAAATCTCAATTTCTTCTTGATTACG-3' |
| GK119              | 5'-CGTAATCAAGAAGAAATTGAAGATTTTAAATTCGGTTAAAACG-3' |
| GK120              | 5'-AAAAGCATGCTTACAATTTCGATTTCAATATCAGCCT-3'       |

|                       |                                                 |
|-----------------------|-------------------------------------------------|
| GK127                 | 5'-AAAAGCTAGCTAAGGAGGAACTACTGTGGAATTATTAATAG-3' |
| GK157                 | 5'-AAAAGGATCCTACATATAAGTAATGACAAGCTTTGG-3'      |
| GK158                 | 5'-GGGTAAGTATTGCCGAGATAAACCTCCTA-3'             |
| GK159                 | 5'-TAGGAGGTTTTATCTCGGCAATAGTTACCC-3'            |
| GK160                 | 5'-CCGTTAGAGCCCCAATCTGATCTGGAGCTGTAAT-3'        |
| GK161                 | 5'-ATTACAGCTCCAGATCAGATTGGGGCTTAACGG-3'         |
| GK162                 | 5'-AAAAGTCGACTTCATCAACAAAATCACAATTGAT-3'        |
| SEQ <i>rsbU</i> F     | 5'-GCGGCAATAACTGGTAGGATTA-3'                    |
| SEQ <i>sigB</i> R     | 5'-AAAAAAGCTAGCCTATTTATGTGCTGCTTC-3'            |
| SEQ <i>rsbU</i> int F | 5'-GAATATTAATCAAATATGTTTCGTAC-3'                |
| SEQ <i>rsbW</i> int R | 5'-CCTAGGCCACCTTCGCGTAAAAAGTC-3'                |
| SEQ <i>vraS</i> F     | 5'-GGATAACTATACAGTTAATATCTACG-3'                |
| SEQ <i>vraS</i> R     | 5'-GCGTTGATAGATAACTTGAAATTCC-3'                 |
| SEQ <i>graS</i> F     | 5'-GGATAGTGCAATCGAAACAAAAGTAGG-3'               |
| SEQ <i>graS</i> R     | 5'-CTGCATTGATGTATCAATTCTAAGTAAC-3'              |
| SEQ <i>agrA</i> F     | 5'-GTGCAGATGATATACCACGTA-3'                     |
| SEQ <i>agrA</i> R     | 5'-AAAAGCCAGCTATACAGTGCATTT-3'                  |
| SEQ <i>walk</i> F     | 5'-AAAACGAGACGCGTAGAGGCGTTGG-3'                 |
| SEQ <i>walk</i> R     | 5'-GCAGTCTTTGTCCATTTTCATCCCAATCACC-3'           |
| SEQ <i>walk</i> int F | 5'-GGATATTACATGTTAAGTGATTAAG-3'                 |
| SEQ <i>fmtC</i> F     | 5'-TAAGAAGCACTCATAATCGGCTGT-3'                  |
| SEQ <i>fmtC</i> R     | 5'-ACTTGATGAAACTGATTGGACTGA-3'                  |
| SEQ <i>fmtC</i> int F | 5'-CTGCATTATCAGGTTTAGTCAGCT-3'                  |
| SEQ <i>fmtC</i> int R | 5'-ATTTTCATCACCTAACGGATCTCC-3'                  |
| SEQ <i>cls2</i> F     | 5'-AGTGTGTTTTTCAAACAAATTGTC-3'                  |
| SEQ <i>cls2</i> R     | 5'-GGCCTGTATAATCATTGATGAATAGATTCC-3'            |
| <i>graRS</i> F        | 5'-AAAAGCTAGCAGGAGGATGCAAATACTAC-3'             |
| <i>graRS</i> R        | 5'-TTTTCTCGAGTTAAATGACAAATTTGTC-3'              |
| <i>pvraSR</i> F       | 5'-AAAAGGATCCTAACTATACAGTTAATATCTACG-3'         |
| <i>pvraSR</i> R       | 5'-AAAAGAGCTCCTATTGAATTAATTATG-3'               |
| <i>walkR</i> F        | 5'-AAAAGGATCCTAATATATAAGTTTATATTGG-3'           |
| <i>walkR</i> R        | 5'-TTTTGAATTCTTATTCATCCCAATCACCGTC-3'           |
| <i>rsbUsigB</i> F     | 5'-AAAAGGATCCTTTTATTATAAAAGGATGTCTTAAG-3'       |
| <i>rsbUsigB</i> R     | 5'-TTTTGGATTCCTATTGATGTGCTGCTTCTTGTA-3'         |
| <i>rpoZ</i> F         | 5'-TATCCGCTTGTTGATGGCCAAGG-3'                   |
| <i>rpoZ</i> R         | 5'-CGCGCTTCAGTATAACGCATTGC-3'                   |

281

282 **Supplementary table S3:** RNA-Seq dataset. Read analysis statistics. Related to main figure 2.

| LIBRARY READ FILE                         | O       | W       | Y       |
|-------------------------------------------|---------|---------|---------|
| No. of input reads                        | 4353946 | 5078847 | 7088389 |
| No. of reads – PolyA detected and removed | 1569588 | 1754263 | 2504657 |
| No. of reads - Single 3' A removed        | 957264  | 943712  | 1891419 |
| No. of reads - Unmodified                 | 1827094 | 2380872 | 2692313 |

|                                                                            |                 |                 |                 |
|----------------------------------------------------------------------------|-----------------|-----------------|-----------------|
| No. of reads - Removed as too short                                        | 39350           | 39306           | 31970           |
| No. of reads - Long enough for alignment                                   | 4314596         | 5039541         | 7056419         |
| Total no. of aligned reads                                                 | 4193429         | 4834286         | 6881138         |
| Total no. of unaligned reads                                               | 121167          | 205255          | 175281          |
| Total no. of uniquely aligned reads                                        | 1670096         | 1807375         | 2185476         |
| Total no. of alignments                                                    | 12682210        | 15931291        | 22630589        |
| Percentage of aligned reads<br>(compared to total input reads)             | 96.31           | 95.18           | 97.08           |
| Percentage of uniquely aligned reads<br>(in relation to all aligned reads) | 39.83           | 37.39           | 31.76           |
| NC_010063.1 - No. of aligned reads                                         | 4230.85238<br>1 | 7224.84285<br>7 | 5718.03095<br>2 |
| NC_010063.1 - No. of uniquely aligned reads                                | 4210            | 7183            | 5692            |
| NC_010063.1 - No. of alignments                                            | 4262            | 7279            | 5766            |
| NC_010079.1 - No. of aligned reads                                         | 4189192.64<br>8 | 4827049.95<br>8 | 6875409.34<br>5 |
| NC_010079.1 - No. of uniquely aligned reads                                | 1665886         | 1800187         | 2179781         |
| NC_010079.1 - No. of alignments                                            | 12677936        | 15923992        | 22624802        |
| NC_012417.1 - No. of aligned reads                                         | 5.5             | 11.2            | 10.625          |
| NC_012417.1 - No. of uniquely aligned reads                                | 0               | 5               | 3               |
| NC_012417.1 - No. of alignments                                            | 12              | 20              | 21              |

283

284 **Supplementary table S4:** Genes differentially expressed in W strain compared to the O strain.

285 Genes with  $\geq 4$ -fold difference in the expression level are listed. Genes that belong to the SigB  
286 regulon are marked in yellow. For instance, production of Bsa antibiotic, which are induced in W  
287 strain more than 318-fold compared to the O strain. Related to main figures 2 and 4.

288

289 **Supplementary table S5:** Genes differentially expressed in Y strain compared to the O strain.

290 Genes with at least  $\geq 2$ -fold difference in the expression level are listed. Genes that belong to the  
291 cell-wall stimulon, typically activated in VISA strains are marked in yellow. Related to main figure  
292 2 and 5.

293

294 **Supplementary table S6:** List of the genomes of the different *Staphylococcus aureus* strains  
295 that have been used in the MAUVE alignment of the region that contains the *bsa* gene cluster in  
296 VISA and VSSA *Staphylococcus aureus* isolates. Related to main figure 5.



| Number | Bacteria species name        | Strain                                     | Accession Number |
|--------|------------------------------|--------------------------------------------|------------------|
| 1      | <i>Staphylococcus aureus</i> | 04-02981                                   | NC_017340.1      |
| 2      | <i>Staphylococcus aureus</i> | 08BA02176                                  | NC_018608.1      |
| 3      | <i>Staphylococcus aureus</i> | subsp. <i>aureus</i> strain 11819-97       | NC_017351.1      |
| 4      | <i>Staphylococcus aureus</i> | subsp. <i>aureus</i> strain 71193          | NC_017673.1      |
| 5      | <i>Staphylococcus aureus</i> | subsp. <i>aureus</i> strain COL            | NC_002951.2      |
| 6      | <i>Staphylococcus aureus</i> | subsp. <i>aureus</i> strain ECT-R_2        | NC_017343.1      |
| 7      | <i>Staphylococcus aureus</i> | subsp. <i>aureus</i> strain ED133          | NC_017337.1      |
| 8      | <i>Staphylococcus aureus</i> | subsp. <i>aureus</i> strain ED98           | NC_013450.1      |
| 9      | <i>Staphylococcus aureus</i> | subsp. <i>aureus</i> strain HO5096_0412    | NC_017763.1      |
| 10     | <i>Staphylococcus aureus</i> | subsp. <i>aureus</i> strain JKD6008        | NC_017341.1      |
| 11     | <i>Staphylococcus aureus</i> | subsp. <i>aureus</i> strain JKD6159        | NC_017338.1      |
| 12     | <i>Staphylococcus aureus</i> | subsp. <i>aureus</i> strain LGA251         | NC_017349.1      |
| 13     | <i>Staphylococcus aureus</i> | subsp. <i>aureus</i> strain M013           | NC_016928.1      |
| 14     | <i>Staphylococcus aureus</i> | subsp. <i>aureus</i> strain MRSA252        | NC_002952.2      |
| 15     | <i>Staphylococcus aureus</i> | subsp. <i>aureus</i> strain MSHR1132       | NC_016941.1      |
| 16     | <i>Staphylococcus aureus</i> | subsp. <i>aureus</i> strain MSSA476        | NC_002953.3      |
| 17     | <i>Staphylococcus aureus</i> | subsp. <i>aureus</i> strain MW2            | NC_003923.1      |
| 18     | <i>Staphylococcus aureus</i> | subsp. <i>aureus</i> strain N315           | NC_002745.2      |
| 19     | <i>Staphylococcus aureus</i> | subsp. <i>aureus</i> strain NCTC_8325      | NC_007795.1      |
| 20     | <i>Staphylococcus aureus</i> | subsp. <i>aureus</i> strain Newman         | NC_009641.1      |
| 21     | <i>Staphylococcus aureus</i> | RF122                                      | NC_007622.1      |
| 22     | <i>Staphylococcus aureus</i> | ST228_10388                                | NC_020529.1      |
| 23     | <i>Staphylococcus aureus</i> | ST228_15532                                | NC_020532.1      |
| 24     | <i>Staphylococcus aureus</i> | ST228_16035                                | NC_020533.1      |
| 25     | <i>Staphylococcus aureus</i> | ST228_18341                                | NC_020536.1      |
| 26     | <i>Staphylococcus aureus</i> | ST228_18412                                | NC_020537.1      |
| 27     | <i>Staphylococcus aureus</i> | subsp. <i>aureus</i> strain ST398          | NC_017333.1      |
| 28     | <i>Staphylococcus aureus</i> | subsp. <i>aureus</i> strain T0131          | NC_017347.1      |
| 29     | <i>Staphylococcus aureus</i> | subsp. <i>aureus</i> strain TCH60          | NC_017342.1      |
| 30     | <i>Staphylococcus aureus</i> | subsp. <i>aureus</i> strain TW20           | NC_017331.1      |
| 31     | <i>Staphylococcus aureus</i> | subsp. <i>aureus</i> strain USA300_FPR3757 | NC_007793.1      |
| 32     | <i>Staphylococcus aureus</i> | subsp. <i>aureus</i> strain USA300_TCH1516 | NC_010079.1      |
| 33     | <i>Staphylococcus aureus</i> | subsp. <i>aureus</i> strain VC40           | NC_016912.1      |
| 34     | <i>Staphylococcus aureus</i> | subsp. <i>aureus</i> strain JH1            | NC_009632.1      |
| 35     | <i>Staphylococcus aureus</i> | subsp. <i>aureus</i> strain JH9            | NC_009487.1      |
| 36     | <i>Staphylococcus aureus</i> | subsp. <i>aureus</i> strain Mu3            | NC_009782.1      |
| 37     | <i>Staphylococcus aureus</i> | subsp. <i>aureus</i> strain Mu50           | NC_002758.2      |

298           **Supplementary table S7:** Definition of a cut-off number to define high and low bacterial  
299 load in the organs of infected mice. We considered mice infection models that have been  
300 previously established to assay staphylococcal infections (Intravenous, intranasal, intraperitoneal  
301 and subcutaneous murine infection models). The bacterial loads of target organs (CFU/g of  
302 organ) were compiled from published experiments that distinguish between superficial bacterial  
303 burden and deep tissue infections. We classified these experiments into three categories: Group  
304 1 contains the CFU/g values of infections from published experiments that compare virulent  
305 strains (+) and attenuated (-) strains of *S. aureus*. Group 2 contains CFU/g values of  
306 staphylococcal infections from published experiments that compared antibiotic treated (+) and  
307 non-treated (-) mice. Group 3 contains CFU/g values of staphylococcal infections from published  
308 experiments that compare immunized (+) and non-immunized (-) mice. All groups of experiments  
309 compare staphylococcal infections that likely develop into deep tissue infections and infections  
310 with attenuated strains (Group 1) or antibiotic-treated mice (Group 2 and 3), in which the  
311 development of severe infections is unlikely (i.e. superficial bacterial burden). The bacterial load  
312 of superficial bacterial burden from groups 1-3 occurred in a range of  $10^3$ - $10^5$  CFU/g in target  
313 organs. In contrast, deep tissue infections contained a bacterial load of  $10^6$ - $10^{10}$  CFU/g of organ.  
314 Thus, deep tissue infections show a bacterial load of  $>10^5$  CFU/g of organ and superficial  
315 bacterial burden show a bacterial load of  $\leq 10^5$  CFU/g of organ. To ascertain whether similar  
316 values occur in our *in vivo* experiment, we assayed an intravenous infection model and the  
317 intranasal infection model to study kidney and lung infections, respectively. We used these two  
318 infection models to determine the bacterial loads of superficial bacterial burden and deep tissue  
319 infections. To do this, we used 2 cohorts of 5 mice to test infections of a virulent strain (LAC) and  
320 an attenuated strain (LAC  $\Delta agr$  mutant). Likewise, 2 additional cohorts of 5 mice were used to  
321 assay LAC infections in the presence and absence of vancomycin treatment (total number of  
322 mice  $n = 40$ ). Organs were aseptically harvested and CFU/g were determined. Superficial  
323 bacterial burden was associated with a bacterial load of  $10^3$ - $10^5$  CFU/g. Deep tissues infections

324 displayed a bacterial load of  $10^6$ - $10^{10}$  CFU/g. Based on this analysis, organs with bacterial loads  
 325  $>10^5$  CFU/g are considered deep tissue infections (i.e. high bacterial load) and organs with  
 326 bacterial load  $\leq 10^5$  CFU/g are considered as a superficial bacterial burden (i.e. low bacterial  
 327 load). Therefore,  $10^5$  CFU/g is the empirically derived cut-off number to distinguish between  
 328 superficial bacterial burden (i.e. low bacterial load) and deep tissue infections (i.e. high bacterial  
 329 load) in our infection experiments. Related to figure 6 and 7.

330

| <b>1) CFU/g organ from mice infected with virulent (+) and attenuated (-) <i>S. aureus</i> strains</b>  |              |                             |                    |                                                      |                                                 |
|---------------------------------------------------------------------------------------------------------|--------------|-----------------------------|--------------------|------------------------------------------------------|-------------------------------------------------|
| <b>Infection model</b>                                                                                  | <b>Organ</b> | <b>Strain virulence</b>     | <b>CFU/g organ</b> | <b>Reference</b>                                     |                                                 |
| Intravenous infection model                                                                             | Kidneys      | +                           | $10^7$             | (Bubeck Wardenburg et al., 2006; Cheng et al., 2010) |                                                 |
|                                                                                                         |              | -                           | $10^5$             |                                                      |                                                 |
|                                                                                                         | Livers       | +                           | $10^7$             | (Bae et al., 2006; Marincola et al., 2012)           |                                                 |
|                                                                                                         |              | -                           | $10^5$             |                                                      |                                                 |
|                                                                                                         | Hearts       | +                           | $10^8$             | (McAdow et al., 2012; Panizzi et al., 2011)          |                                                 |
|                                                                                                         |              | -                           | $10^5$             |                                                      |                                                 |
| Intranasal infection model                                                                              | Lungs        | +                           | $10^7$             | (Chen et al., 2013; Mitchell et al., 2013)           |                                                 |
|                                                                                                         |              | -                           | $10^4$             |                                                      |                                                 |
| Intraperitoneal infection model                                                                         | Kidneys      | +                           | $10^8$             | (Cohn, 1962; Kapral, 1966)                           |                                                 |
|                                                                                                         |              | -                           | $10^5$             |                                                      |                                                 |
|                                                                                                         | IP lesions   | +                           | $10^7$             |                                                      | (Dye and Kapral, 1981; Kapral et al., 1980)     |
|                                                                                                         |              | -                           | $10^5$             |                                                      |                                                 |
| Subcutaneous infection model                                                                            | Skin abscess | +                           | $10^7$             | (Bunce et al., 1992; Ford et al., 1989)              |                                                 |
|                                                                                                         |              | -                           | $10^5$             |                                                      |                                                 |
| <b>2) CFU/g organ from infected mice treated (+) and non-treated (-) with antibiotics</b>               |              |                             |                    |                                                      |                                                 |
| <b>Infection model</b>                                                                                  | <b>Organ</b> | <b>Antibiotic treatment</b> | <b>CFU/g organ</b> | <b>Reference</b>                                     |                                                 |
| Intravenous infection model                                                                             | Kidneys      | -                           | $10^{10}$          | (Georgopoulos et al., 1992; Oh et al., 2010)         |                                                 |
|                                                                                                         |              | +                           | $10^5$             |                                                      |                                                 |
|                                                                                                         | Livers       | -                           | $10^7$             | (Piper et al., 2012; Tsao et al., 2003)              |                                                 |
|                                                                                                         |              | +                           | $10^5$             |                                                      |                                                 |
|                                                                                                         | Hearts       | -                           | $10^8$             | (Gibson et al., 2007; Jabes et al., 2011)            |                                                 |
|                                                                                                         |              | +                           | $10^3$             |                                                      |                                                 |
| Intranasal infection model                                                                              | Lungs        | -                           | $10^8$             | (Harada et al., 2013; Jacqueline et al., 2014)       |                                                 |
|                                                                                                         |              | +                           | $10^5$             |                                                      |                                                 |
| Intraperitoneal infection model                                                                         | Kidneys      | -                           | $10^8$             | (Lobo and Mandell, 1972; Sande et al., 2012)         |                                                 |
|                                                                                                         |              | +                           | $10^4$             |                                                      |                                                 |
|                                                                                                         | IP lesions   | -                           | $10^7$             |                                                      | (Kokai-Kun et al., 2007; Sandberg et al., 2011) |
|                                                                                                         |              | +                           | $10^4$             |                                                      |                                                 |
| Subcutaneous infection model                                                                            | Skin abscess | -                           | $10^7$             | (Foletti et al., 2013; van Sorge et al., 2013)       |                                                 |
|                                                                                                         |              | +                           | $10^5$             |                                                      |                                                 |
| <b>3) CFU/g organ from mice immunized (+) and non-immunized (-) against <i>S. aureus</i> infections</b> |              |                             |                    |                                                      |                                                 |

| Infection model                 | Organ        | Immunization | CFU/g organ                                      | Reference                                      |
|---------------------------------|--------------|--------------|--------------------------------------------------|------------------------------------------------|
| Intravenous infection model     | Kidneys      | -            | $10^7$                                           | (Kim et al., 2012; McKenney et al., 1999)      |
|                                 |              | +            | $10^4$                                           |                                                |
|                                 | Livers       | -            | $10^7$                                           | (Hu et al., 2009; Rozalska and Wadstrom, 1993) |
|                                 |              | +            | $10^5$                                           |                                                |
| Hearts                          | -            | $10^8$       | (Ekstedt and Yoshida, 1969; McAdow et al., 2011) |                                                |
|                                 | +            | $10^5$       |                                                  |                                                |
| Intranasal infection model      | Lungs        | -            | $10^7$                                           | (Bubeck Wardenburg and Schneewind, 2008)       |
|                                 |              | +            | $10^4$                                           |                                                |
| Intraperitoneal infection model | Kidneys      | -            | $10^6$                                           | (Kim et al., 2011; Mariotti et al., 2013)      |
|                                 |              | +            | $10^3$                                           |                                                |
|                                 | IP lesions   | -            | $10^8$                                           | (Easmon and Glynn, 1975; Rauch et al., 2012)   |
|                                 |              | +            | $10^5$                                           |                                                |
| Subcutaneous infection model    | Skin abscess | -            | $10^8$                                           | (Tkaczyk et al., 2013; Weinandy et al., 2014)  |
|                                 |              | +            | $10^5$                                           |                                                |

**4) Experimental quantification of CFU/g organ from mice infected with virulent (+) and attenuated (-) *S. aureus* strains**

| Infection model             | Organ   | Cohort | Strain virulence | CFU/g organ | Range       | Reference  |
|-----------------------------|---------|--------|------------------|-------------|-------------|------------|
| Intravenous infection model | Kidneys | n=5    | -                | $10^5$      | $10^3-10^5$ | This study |
|                             |         |        |                  | $10^5$      |             |            |
|                             |         |        |                  | $10^4$      |             |            |
|                             |         |        |                  | $10^5$      |             |            |
|                             |         |        |                  | $10^3$      |             |            |
| Intravenous infection model | Kidneys | n=5    | +                | $10^9$      | $10^7-10^9$ | This study |
|                             |         |        |                  | $10^8$      |             |            |
|                             |         |        |                  | $10^8$      |             |            |
|                             |         |        |                  | $10^7$      |             |            |
|                             |         |        |                  | $10^8$      |             |            |
| Intranasal infection model  | Lungs   | n=5    | -                | $10^4$      | $10^3-10^4$ | This study |
|                             |         |        |                  | $10^3$      |             |            |
|                             |         |        |                  | $10^4$      |             |            |
|                             |         |        |                  | $10^4$      |             |            |
|                             |         |        |                  | $10^3$      |             |            |
| Intranasal infection model  | Lungs   | n=5    | +                | $10^6$      | $10^6-10^8$ | This study |
|                             |         |        |                  | $10^7$      |             |            |
|                             |         |        |                  | $10^7$      |             |            |
|                             |         |        |                  | $10^6$      |             |            |
|                             |         |        |                  | $10^8$      |             |            |

**5) Experimental quantification of CFU/g organ from infected mice that were treated (+) and non-treated (-) with vancomycin (200mg/Kg)**

| Infection model             | Organ   |     | Antibiotic treatment | CFU/g organ | Range          | Reference  |
|-----------------------------|---------|-----|----------------------|-------------|----------------|------------|
| Intravenous infection model | Kidneys | n=5 | -                    | $10^8$      | $10^8-10^{10}$ | This study |
|                             |         |     |                      | $10^9$      |                |            |
|                             |         |     |                      | $10^{10}$   |                |            |
|                             |         |     |                      | $10^8$      |                |            |
|                             |         |     |                      | $10^8$      |                |            |
|                             |         | n=5 | +                    | $10^3$      | $10^3-10^5$    | This study |

|                                                                              |       |                 |                                  |                 |                                    |            |
|------------------------------------------------------------------------------|-------|-----------------|----------------------------------|-----------------|------------------------------------|------------|
|                                                                              |       |                 |                                  | 10 <sup>5</sup> |                                    |            |
|                                                                              |       |                 |                                  | 10 <sup>5</sup> |                                    |            |
|                                                                              |       |                 |                                  | 10 <sup>4</sup> |                                    |            |
|                                                                              |       |                 |                                  | 10 <sup>5</sup> |                                    |            |
| Intranasal infection model                                                   | Lungs | n=5             | -                                | 10 <sup>6</sup> | 10 <sup>6</sup> -10 <sup>7</sup>   | This study |
|                                                                              |       |                 |                                  | 10 <sup>7</sup> |                                    |            |
|                                                                              |       |                 |                                  | 10 <sup>7</sup> |                                    |            |
|                                                                              |       |                 |                                  | 10 <sup>7</sup> |                                    |            |
|                                                                              |       |                 |                                  | 10 <sup>6</sup> |                                    |            |
| n=5                                                                          | +     | 10 <sup>3</sup> | 10 <sup>3</sup> -10 <sup>4</sup> | This study      |                                    |            |
|                                                                              |       | 10 <sup>4</sup> |                                  |                 |                                    |            |
|                                                                              |       | 10 <sup>4</sup> |                                  |                 |                                    |            |
|                                                                              |       | 10 <sup>4</sup> |                                  |                 |                                    |            |
|                                                                              |       | 10 <sup>4</sup> |                                  |                 |                                    |            |
| <b>6) Range of CFU/g or organ of infected mice and definition of cut-off</b> |       |                 |                                  |                 |                                    |            |
| <b>Organ colonization</b>                                                    |       |                 | <b>Progression of infection</b>  |                 | <b>CFU/g organ (range)</b>         |            |
| Low bacterial burden (low bacterial load)                                    |       |                 | -                                |                 | 10 <sup>3</sup> - 10 <sup>5</sup>  |            |
| Deep tissue infection (high bacterial load)                                  |       |                 | +                                |                 | 10 <sup>6</sup> – 10 <sup>10</sup> |            |
| Cut-off number of bacterial load                                             |       |                 |                                  |                 | 10 <sup>5</sup>                    |            |

331

## 332 Supplemental Experimental Procedures

### 333 Strains, Media and Culture Conditions.

334 Strains used in this study were *S. aureus* derivative of Sc01 (Beenken et al., 2003),  
 335 Newman (Lipinski et al., 1967), N315 (Ito et al., 1999), HG003 (Herbert et al., 2010) and LAC  
 336 (Kazakova et al., 2005) isolates. The laboratory *S. aureus* strain RN4220 (Kornblum, 1990) was  
 337 used for cloning purposes. *Bacillus subtilis* strain 168 was occasionally used as genetic  
 338 background to generate a transducer strain that senses the presence of AIP and to assay for the  
 339 activity of Bsa in antibiogram experiments. The strain *Escherichia coli* DH5α was used for  
 340 propagating plasmids and genetic constructs in laboratory conditions. A complete strain list is  
 341 shown in table S1.

342

343 *B. subtilis* and *E. coli* strains were regularly grown in LB medium. When required,  
 344 selective media were prepared in LB agar using antibiotics at the following final concentrations:  
 345 ampicillin 100 μg/ml, kanamycin 50 μg/ml, chloramphenicol 5 μg/ml, tetracycline 5 μg/ml, and

346 erythromycin 2  $\mu\text{g/ml}$ . *S. aureus* strains were routinely propagated in liquid TSB medium  
347 incubated with shaking (200 rpm) at 37°C for 24h. When required, selective media were  
348 prepared in TSB agar using antibiotics at the following final concentrations: kanamycin 50  $\mu\text{g/ml}$ ,  
349 chloramphenicol 10  $\mu\text{g/ml}$ , tetracycline 5  $\mu\text{g/ml}$ , and erythromycin 2-80  $\mu\text{g/ml}$ . To generate  
350 multicellular aggregates, a inoculum TSB plate was grown for 12h at 37°C. 2  $\mu\text{l}$  of a cell  
351 suspension from the inoculum were spotted on the surface of TSB agar plates supplemented  
352 with  $\text{MgCl}_2$  100 mM and incubated at 37°C for 5 days. When specified, AIP was added at  
353 concentrations of 1-5  $\mu\text{M}$  and Bsa was added to different concentrations that are specified in the  
354 body of the paper. Specific growth conditions are presented in the figure legends.

355

356 To grow *S. aureus* biofilms, a preculture grown overnight in TSB liquid medium was  
357 diluted 1:100 in TSB + Glucose 0.5% + NaCl 3% (Blevins et al., 2003), dispensed in polystyrene  
358 well plates and incubated overnight at 37° C. Biofilms formed by *S. aureus* were stained with  
359 crystal violet (1%) for better visualization according to (O'Toole and Kolter, 1998). Secretion of  
360 hemolytic toxins was monitored by spotting 3  $\mu\text{l}$  of *S. aureus* cultures in TSB agar plates  
361 containing 5% sheep blood and measuring the diameter size after 24h of incubation at 37° C.  
362 Subsequent incubation at 4°C was used to asses  $\beta$ -hemolysis. Production of the pigment  
363 staphyloxanthin was quantified by correlating production of staphyloxanthin with the optical  
364 density of the culture. To purify staphyloxanthin, cell pellets were dissolved 1:1 (v/v) in ethanol  
365 and incubated for 2 h at 45°C. After centrifugation, the pellet was discarded and the ethanol  
366 containing the pigments was concentrated by evaporation (Pelz et al., 2005; Wieland et al.,  
367 1994). Quantification of the concentration of the pigment was performed by spetrophotometry  
368 analysis ( $\lambda=460\text{nm}$ ) (Giachino et al., 2001). To assess the ability of the subpopulation to spread  
369 on solid surfaces, 2  $\mu\text{l}$  of an overnight culture was spotted on TSB 0.24% agar plates and  
370 incubated at 37°C for 24 hours (Tsompanidou et al., 2011). To assess the resistance of *S.*

371 *aureus* cells to lysostaphin treatment, Staphylococcal strains were resuspended in 1 ml PBS.  
372 100 µl of the suspension was then incubated for 15 minutes at 37°C in the presence of  
373 lysostaphin (10 µg/ml) (Cui et al., 2006; Daum et al., 1992). Serial dilutions were plated on LB  
374 and TSB plates to determine CFU and compared to untreated cell suspensions.

375

### 376 **Strain generation**

377 A LACΔ*sigB* and Sc01Δ*bsa* mutants were generated by phage transduction. Briefly, φ11  
378 phage lysates were generated from *S. aureus* Newman Δ*sigB::erm<sup>R</sup>* to infect LAC. Clones  
379 resistant to erythromycin were further verified using PCR. To generate the *S. aureus* strain with a  
380 deletion of the *bsa* operon, 500 bp flanking the operon, as well as the chloramphenicol cassette  
381 were amplified using primers GK157/GK158, GK161/GK162, and GK159/GK160 respectively.  
382 The fragments were subsequently joined together using a long-flanking homology PCR (LFH-  
383 PCR) (Wach, 1996). This fragment was then cloned into pMAD (Arnaud et al., 2004) using  
384 BamHI/Sall and transformed into *S. aureus* RN4220. φ11 phage lysates were used to infect  
385 USAΔ*sigB* and double homologous recombination was carried out as previously described  
386 (Arnaud et al., 2004). Clones were verified using PCR.

387

388 To measure AIP production, a *Bacillus subtilis* reporter strain was created in which a  
389 chimeric version of the membrane-bound sensor kinase ComP replaces the native kinase  
390 (Magnuson et al., 1994; Solomon et al., 1995). The chimera contains the sensing domain of the  
391 staphylococcal AgrC sensor kinase that recognizes the AIP pheromone (Novick and Geisinger,  
392 2008). To generate the chimera, the DNA fragments corresponding to the specific protein  
393 regions of AgrC and ComP kinases were fused by LFH-PCR, using the primers GK127/GK118  
394 (for AgrC) and GK119/GK120 (for ComP). The resultant DNA fragment was cloned into pDR111  
395 vector and subcloned into pDG1663 vector. The final construct was linearized and integrated into  
396 the *amyE* neutral locus of *B. subtilis* chromosome (strain 168). Additional genetic modifications to

397 this strain were as follows:  $\Delta comQXP::spc$  mutation was included to fully inactivate the native  
398 quorum sensing signaling pathway of *B. subtilis*. Furthermore, a transcriptional reporter  $P_{srf-yfp}$   
399 was inserted in the *lacA* neutral loci of the bacterial chromosome. The expression of this reporter  
400 is strongly regulated by the activation of the AgrC-ComP chimera and its activation results in the  
401 expression of a yellow fluorescent protein YFP (Nakano et al., 1991). Thus, the genetic  
402 description of the reporter strain is *B. subtilis* 168  $\Delta comQXP::spc$ ;  $lacA::P_{srf-yfp}$ ;  $amyE::P_{hp} agrC-$   
403  $comP$ . To monitor AIP levels, O, W and Y strains were grown overnight in TSB medium. Cells  
404 were pelleted and supernatants filter-sterilized (pore size: 0.2  $\mu$ M). An overnight culture of the  
405 reporter strain was diluted 1:100 in LB medium and subsequently diluted in passages to fresh  
406 medium every two hours, to maintain the reporter strain exponentially growing for a long time  
407 period. Then, 180  $\mu$ l were mixed together with 20  $\mu$ l of each AIP containing supernatant.  
408 Fluorescence was monitored using a Tecan plate reader (excitation: 485 nm, emission: 535 nm)  
409 at 30°C. Data points prior to maximum fluorescence were used for comparison (about 2 h after  
410 initiation of the assay).

411

#### 412 **RNA extraction**

413 O, W and Y strains went through several isolation processes on TSB plates to verify the  
414 purity of the cultures prior RNA extraction. Cells were grown overnight on a TSB plate before  
415 resuspended in RNA Protect (Qiagen®, USA) according to the manufacturer's instructions. Cell  
416 pellets were resuspended in 1ml RLT buffer and mechanically lysed using glass beads in a Fast  
417 Prep Shaker (2 times, 45 s, speed: 6.5). The cell lysate was centrifuged for 10 min, 11, 000 x g,  
418 4°C. The supernatant was used for RNA isolation using the RNeasy mini kit (Qiagen®, USA)  
419 according to the protocol. The isolated RNA was treated with RNase-free DNase I (New England  
420 Biolabs®, USA) to remove any DNA traces.

421

#### 422 **RNA-Seq library construction, sequencing and qRT-PCR analysis**



423 The cDNA libraries were generated as described previously for eukaryotic microRNAs but  
424 omitting the RNA size-fractionation step prior to cDNA synthesis (Dugar et al., 2013) (Vertis  
425 Biotechnologie AG, Germany). For this the RNA samples were poly(A)-tailed by using poly(A)  
426 polymerase. The 5'-PPP were removed using tobacco acid pyrophosphatase (TAP) followed by  
427 the ligation of the RNA adapter to the 5'-monophosphate of the RNA. First-strand cDNA  
428 synthesis was performed with an oligo(dT)-adapter primer and the M-MLV reverse transcriptase.  
429 The resulting cDNA was PCR-amplified to reach a concentration of 20-30 ng/μl using a high  
430 fidelity DNA polymerase. The cDNA was purified using the Agencourt AMPure XP kit (Beckman  
431 Coulter Genomics) and was analyzed by capillary electrophoresis. The primers used for PCR  
432 amplification were designed for TruSeq sequencing according to the instructions of Illumina. The  
433 following adapter sequences flank the cDNA inserts: TrueSeq\_Sense: 5'-  
434 AATGATACGGCGACCACC-GAGATCTACACTCTTTCCCTACACGACGCTCTTCCGAT-T-3'  
435 TrueSeq-AntisenseNNNNNN (NNNNNN = Barcode) 5'-CAAGCAGAAGACGGCATAC-  
436 GAGATNNNNNNGTGACTGG-AGTTCAGACGTGTGCTCTTCC-GATC(dT25)-3'. The combined  
437 length of the flanking sequences is 146 bases. The libraries were sequenced with an Illumina  
438 HiSeq machine with 100 cycles in single end mode. To perform qRT-PCR analysis, total RNA  
439 was extracted using RNeasy Mini Kit (Qiagen), according to the manufacturer's instructions. For  
440 quantification of gene expression, total RNA was reverse transcribed using hexameric random  
441 primers followed by qRT-PCR using SsoAdvanced SYBR Green Supermix (BioRad, USA),  
442 according to the manufacturer's instructions and using primers listed in table S2. qRT-PCR  
443 experiments of this report follows the standard MIQE guidelines for publication of qRT-PCR  
444 experiments (Bustin et al., 2009).

445

#### 446 **Bioinformatical analysis**

447 The pooled sequence reads were demultiplexed and the adapter sequences were  
448 removed. After that the reads in Fastq format were quality trimmed using fastq\_quality\_trimmer

449 (from the FastX suite version 0.0.13 - [http://hannonlab.cshl.edu/fastx\\_toolkit/](http://hannonlab.cshl.edu/fastx_toolkit/)) with a cut-off  
450 Phred score of 20 and converted to Fasta format using Fastq\_to\_Fasta (also from the FastX  
451 suite). The read processing (poly(A) removal, size filtering (min 12 nt length), statistics  
452 generation, coverage calculation and normalization was performed with the RNA-analysis  
453 pipeline RAPL version 0.1 with default parameters which used segemehl version 0.1.3  
454 (Hoffmann et al., 2009) for the read alignment and DESeq 1.12.0 (Anders and Huber, 2010) for  
455 differential gene expression analysis. As reference sequences and annotations the data of *S.*  
456 *aureus* LAC FPR3757 (NCBI IDs: NC\_010063.1, NC\_010079.1, NC\_012417.1) was used.  
457 Scatter plots comparing the gene wise expression levels were normalized by the size estimation  
458 factor calculated by DESeq of the different strain, which were generated using matplotlib  
459 (<http://matplotlib.sourceforge.net/>). Genes with an up- or down-regulation factor of 1.5 and a p-  
460 value of maximum 0.05 were allocated to functional groups. For this, the information about genes  
461 and their functional group were downloaded from the JCVI Comprehensive Microbial Resource  
462 ftp server (Peterson et al., 2001) which contains functional allocation for *S. aureus* LAC  
463 FPR3757. All genes of the *S. aureus* LAC TCH1516 (NC\_010063.1, NC\_010079.1,  
464 NC\_012417.1) were aligned against all genes from *S. aureus* LAC FPR3757 (NC\_007790.1,  
465 NC\_007791.1, NC\_007792.1, NC\_007793.1) and vice versa with a maximum e-value of 0.01  
466 and a minimal bit score of 60 using makeblastdb and blastn from the BLAST+ suite version  
467 2.2.28 (Camacho et al., 2009). If two genes had a best-reciprocal-hit-relationship they were  
468 treated as orthologs. Via this ortholog allocation the function group associations were made for  
469 the up- and down-regulated genes determined before. The number of such genes was summed  
470 up for each group and visualized. The demultiplexed files and coverages files in wiggle format  
471 have been deposited in NCBI's Gene Expression Omnibus (Edgar et al., 2002) and are  
472 accessible through GEO Series accession number GSE49636  
473 (<http://www.ncbi.nlm.nih.gov/geo/query/acc.cgi?acc=49636>).

474

475 ***in silico* genome comparison**

476 Genomics regions comprising 1.5 Kb upstream and 1.5 Kb downstream the location of  
477 the *bsa* gene cluster were extracted from the *S. aureus* genomes subsp. *aureus* LAC\_TCH1516  
478 (Accession number NC\_010079.1) as the reference sequence and, subsequently from subsp.  
479 *aureus* JH1 (NC\_009632.1), subsp. *aureus* JH9 (NC\_009487.1), subsp. *aureus* Mu50  
480 (NC\_002758.2) and subsp. *aureus* Mu3 (NC\_009782.1) using extractseq from EMBOSS Suite  
481 (<http://emboss.bioinformatics.nl/cgi-bin/emboss/extractseq>) (Rice et al., 2000). These regions  
482 were aligned using the open-source MAUVE aligner version 2.3.1 (Darling et al., 2004; Darling et  
483 al., 2011). A non-progressive alignment was performed using a seed-weight of 19 while the  
484 remaining parameters were run by default. Whole Genome Sequences (WGSs) alignment was  
485 performed using the MAUVE version 2.3.1 with its progressive algorithm. The 37 complete  
486 genomes were aligned using a seed-weight of 19 and assuming collinear genomes, while the  
487 other mandatory parameters were run by default. The complete list of the genomes and their  
488 accession numbers can be found in the supplementary table. After the initial set of multiple  
489 alignments, MAUVE generates a distance matrix and constructs a Neighbor Joining guide tree  
490 that clusters organisms with similar genomic content (Darling et al., 2004; Darling et al., 2011).  
491 The graphical representation of this guide tree was obtained using the open-software FigTree  
492 (<http://tree.bio.ed.ac.uk/software/figtree/>).

493

494 **Purification of small molecules**

495 We followed published to obtain an enriched fraction of AIP (P et al., 2001) and Bsa (Daly  
496 et al., 2010) small molecules. Briefly, a 500 ml culture of the *W* strain was grown overnight in  
497 TSB broth and, after the removal of bacterial cells by centrifugation, the supernatant was filtered  
498 through a 0.22 mm membrane filter. The filtered supernatant was loaded into a C18 Sep-Pak  
499 cartridge (Waters®, USA) previously stabilized with aqueous 20% CH<sub>3</sub>CN and 0.1%  
500 trifluoroacetic acid. Bsa was eluted from the cartridge with 10 mL of aqueous 60% CH<sub>3</sub>CN and

501 0.1% trifluoroacetic acid and neutralized with ammonium. Elution of AIP was achieved with a 20-  
502 45% concentration range of CH<sub>3</sub>CN. Fresh AIP fractions were used in each experiment due to  
503 the high instability of the preparation.

504

### 505 **Flow Cytometry**

506 For flow cytometric analysis, cells were dispersed from biofilms with 12 sonication pulses  
507 (power output 0.7 and cycle 50%). After dispersion, cells were fixed with a treatment of 4%  
508 paraformaldehyde, washed and resuspended in PBS buffer. Dilution of samples 1:100 was  
509 necessary prior flow cytometry analyses. Further sonication treatment was required to separate  
510 single cells in the sample. In this case, samples were subjected to three consecutive series of 12  
511 pulses of (power output 50% and cycle 0.7 sec). Flow cytometry analysis was carried out in a BD  
512 Fortessa flow cytometer (BD Biosciences, USA). For GFP fluorescence, we used a laser  
513 excitation of 488 nm coupled with 530/30 and 505LP sequential filters. The photomultiplier  
514 voltage was set between 400 and 500 V. No gates were required during the analysis of the  
515 samples. Every sample was analyzed measuring 50,000 events using FACS Diva (BD  
516 Biosciences, USA) software to capture the data. Further data analysis was performed in FlowJo  
517 9.2 (<http://www.flowjo.com>).

518

### 519 **Western Blot**

520 Western blot analysis was performed to determine semi-quantitatively the levels of SigB  
521 and RsbW in O, W and Y strains. The strains were grown for 6 h in TSB medium. Cultures were  
522 pelleted and resuspended in SMM buffer (1M sucrose, 40 mM MgCl<sub>2</sub>, 40 mM maleic acid; pH  
523 6.5) containing 20 µg/ml lysostaphin. After 10 min incubation at 37 °C cells were lysed using a  
524 French Press (SLM Aminco Instruments®, USA) at 20.000 psi for three times. Cell debris was  
525 removed by centrifuging lysate at 15.000 rpm, 10 min at 4°C. Subsequently, supernatant was  
526 centrifuged at 80.000 rpm for 1h at 4°C to remove membrane fractions. 20 µg of proteins of the

527 cytosolic fractions were loaded on a 12.5 % SDS-PAGE (for SigB detection) or 15 % SDS-PAGE  
528 (for RsbW detection), respectively. Proteins were transferred to a PVDF membrane incubated  
529 overnight in the presence of polyclonal antibodies against SigB or RsbW, kindly provided by Dr.  
530 S. Engelmann (University of Greiswald, Germany). Proteins were detected after incubation with  
531 the secondary antibody (anti-rabbit IgG-HRP, BioRad®, USA) using the chemiluminescent  
532 substrate Kit (Thermo Scientific®, USA). Chemiluminescence was recorded with the Illumination  
533 System ImageQuant LAS4000 (General Electric®, USA).

534

### 535 **Fluorescence microscopy and transmission electron microscopy**

536 To assay fluorescence microscopy, cells were resuspended in 1 ml of 4%  
537 paraformaldehyde solution and incubated at room temperature for seven minutes. After washing,  
538 samples were resuspended in PBS buffer. Samples were repeatedly washed prior single-cell  
539 analysis. Images were processed using Leica Application Suite V3.7 software. Microscopy  
540 images were taken on a Leica DMI6000B microscope equipped with a Leica CRT6000  
541 illumination system. The microscope was equipped with a HCX PL APO oil immersion objective  
542 with 100x1.47 magnification that was used in this study. The microscope was also equipped with  
543 a color camera Leica DFC630FX. Image processing was done using Leica Application Suite  
544 Advance Fluorescence Software and Photoshop. YFP fluorescence signal was detected using  
545 an excitation filter BP500/20 and an emission filter BP535/30. Excitation time was between 100  
546 and 200 msec. Transmitted light images were taken with 36 msec of excitation time.

547

548 Subcellular localization of fluorescein-labeled vancomycin (Van-FL) was performed  
549 following the protocols published in (Pereira et al., 2007). To specifically visualize new cell wall  
550 synthesis, cells were grown in the presence of D-Serine 60 mM until mid-stationary phase. Cells  
551 were harvested, washed and grown in regular medium for 15 min. Cells were harvested and  
552 incubated at 4°C for 5 min before Van-FL labeling. For Van-FL labeling, cells were incubated

553 with Van-FL (1 µg/ml) for 5 min. Additional membrane staining was performed by incubating cells  
554 with Nile Red (Sigma, USA) to a final concentration of 0.5 µg/ml for 10 min. After labeling, cells  
555 were washed several times with PBS buffer and then analyzed by fluorescence microscopy. To  
556 specifically visualize the diffusion of vancomycin into *S. aureus* cell wall, cells were grown until  
557 mid-stationary phase. Non-fluorescent vancomycin (3 µg/ml) was added and cells were  
558 incubated 1 hour at room temperature. After washing, cells were harvested and incubated at 4°C  
559 for 5 min before Van-FL labeling (Van-FL 5 µg/ml for 1 min). We performed additional membrane  
560 staining with Nile Red (0.5 µg/ml for 10 min) for better visualization of the cells. Subcellular  
561 quantification of the fluorescent membrane signal was performed using Leica Application Suite  
562 Advance Fluorescence Software and ImageJ. Quantitative analysis of the diffusion of  
563 fluorescein-labeled vancomycin through the cell wall of O, W and Y cells was performed  
564 according to the protocol published by (Pereira et al., 2007). Cells were harvested and incubated  
565 at 4°C for 5 min before Van-FL labeling. For Van-FL labeling, cells were incubated with Van-FL  
566 (1 µg/ml) for 5 min. 100 dividing cells were randomly selected from each strain and the Van-FL  
567 signal measured using fluorescence microscopy and using Leica Application Software Analysis  
568 and Fiji. Fluorescence of bound Van-FL signal was considered only in cells with complete  
569 formed septa. The signal was measured at the peripheral cell wall and at the division septum.  
570 Cells were classified into 3 categories attending to their Van-FL diffusion rate. Category 1 (C1):  
571 Cells showed higher fluorescent signal associated with the cell wall than with the septum.  
572 Category 2 (C2): Cells showed a uniform distribution of the fluorescent signal in the cell wall and  
573 in the septum. Category 3 (C3): Cells showed higher fluorescent signal associated with the  
574 septum than with the cell wall. Control experiment compares the diffusion of Van-FL in two  
575 isogenic VSSA/VISA strains (N315/Mu50). To generate Van-FL, 500 µl of vancomycin 10 mg/ml  
576 was mixed with 50 µl of 5(6)-carboxyfluorescein-N-hydroxysuccinimideester 5 mg/ml (Roche,  
577 USA) to generate a 5:1 mixture of vancomycin:fluorescein. The reaction was incubated overnight  
578 at 4 °C and 1:1 diluted in Tris buffer and resulting solution was stored at - 20 °C in aliquots. The

579 final concentration of Van-FL of this stock was assumed to be 5 mg/ml with relatively little free  
580 fluorescein. The minimal inhibitory concentration of Van-FL was similar to that of the original  
581 vancomycin (~ 1µg/ml).

582

583 For transmission electron microscopy, cells were grown overnight on LB plates. Cells were  
584 collected and washed with PBS. Subsequently cells were fixed for 2h in fixation buffer (2 %  
585 paraformaldehyde, 2.5 % glutardialdehyde, 0.1 M sodium cacodylate; pH 7.2) at 4°C. After  
586 washing the cells twice with 50 mM sodium cacodylate (pH 7.2), and afterwards with distilled  
587 water, samples were stained with aqueous uranyl acetate (0.5 %) overnight at 4°C.  
588 Subsequently samples were dehydrated and embedded in Epon812 before inspecting them  
589 under an Zeiss EM900 electron microscope. Negatives were digitalized by scanning and  
590 processed with Adobe Photoshop.

591

### 592 **Mouse infection studies**

593 All animal studies were approved by the local government of Lower Franconia, Germany  
594 (license number 55.2-2531.01-06/12) and were performed in strict accordance with the  
595 guidelines for animal care and animal experimentation. Female BALB/c mice (16–18 g) were  
596 purchased from Charles River® (Germany), housed in polypropylene cages and supplied with  
597 food and water ad libitum. The *S. aureus* derivative was cultured for 18 h at 37°C on a LB plate.  
598 Subsequently, cells were collected and washed three times with PBS and diluted to the desired  
599 concentration. Viable cell counts were determined by plating dilutions of the inoculum on  
600 mannitol salt-phenol red agar plates. 100 µl *S. aureus* culture was injected into the tail vein of 5  
601 mice. 6 days after bacterial challenge, organs were aseptically harvested and the CFU  
602 determined. For this purpose, kidneys, livers, heart, spleen and lungs were homogenized in 2 ml  
603 of sterile PBS using Dispomix (Bio-Budget Technologies GmbH, Germany) (Marincola et al.,  
604 2012). Joints were ground in a mortar prior Dispomix homogenization. Serial dilutions of each

605 organ were plated on mannitol salt-phenol red agar plates, LB and TSB plates and incubated at  
606 37°C for at least 48 h. CFUs were counted and the bacterial burden calculated as CFU/g of  
607 organ. In addition, the occurrence of subpopulations was determined by selecting for color and  
608 vancomycin resistance. To compare the infective potential of O, W and Y strains, 3 cohorts of 5  
609 mice were infected 100 µl *S. aureus* culture containing 10<sup>7</sup> cells injected into the tail vein. Each  
610 strain was used to infect one cohort of mice. The infections were allowed to progress until severe  
611 infections symptoms occurred or to an endpoint of 5 days. Criteria for determining severe  
612 infection included body weight, ruffled fur, hunched posture, decreased activity and labored  
613 breathing. Animals were sacrificed when they meet the following criteria: 1) loss of at least 20%  
614 of body weight; 2) loss of at least 15% of body weight and ruffled fur; 3) loss of at least 10% of  
615 body weight and hunched posture 4) 5 days of infection. Organs were aseptically harvested and  
616 the CFU determined. To determine cut-off number of bacterial load, 8 cohorts of 5 mice were  
617 infected with 10<sup>7</sup> cells via tail vein injection (in the case of the intravenous infection mouse  
618 model) or intranasal inoculation (in the case of the intranasal infection mouse model). 5 days  
619 after bacterial challenge, target organs were aseptically harvested and the CFU determined. For  
620 this purpose, kidneys were harvested from the intravenous infection mouse model and the lungs  
621 were harvested from the intranasal infection mouse model.

622  
623  
624

### **Supplementary References**

- 625 Albus, A., Arbeit, R.D., and Lee, J.C. (1991). Virulence of *Staphylococcus aureus* mutants  
626 altered in type 5 capsule production. *Infect Immun* 59, 1008-1014.
- 627 Anders, S., and Huber, W. (2010). Differential expression analysis for sequence count data.  
628 *Genome Biol* 11, R106.
- 629 Arnaud, M., Chastanet, A., and Debarbouille, M. (2004). New vector for efficient allelic  
630 replacement in naturally nontransformable, low-GC-content, gram-positive bacteria. *Appl Environ*  
631 *Microbiol* 70, 6887-6891.
- 632 Bae, T., Baba, T., Hiramatsu, K., and Schneewind, O. (2006). Prophages of *Staphylococcus*  
633 *aureus* Newman and their contribution to virulence. *Mol Microbiol* 62, 1035-1047.



- 634 Bae, T., Banger, A.K., Wallace, A., Glass, E.M., Aslund, F., Schneewind, O., and Missiakas,  
635 D.M. (2004). *Staphylococcus aureus* virulence genes identified by bursa aurealis mutagenesis  
636 and nematode killing. *Proc Natl Acad Sci U S A* *101*, 12312-12317.
- 637 Beenken, K.E., Blevins, J.S., and Smeltzer, M.S. (2003). Mutation of *sarA* in *Staphylococcus*  
638 *aureus* limits biofilm formation. *Infect Immun* *71*, 4206-4211.
- 639 Blevins, J.S., Beenken, K.E., Elasri, M.O., Hurlburt, B.K., and Smeltzer, M.S. (2002). Strain-  
640 dependent differences in the regulatory roles of *sarA* and *agr* in *Staphylococcus aureus*. *Infect*  
641 *Immun* *70*, 470-480.
- 642 Blevins, J.S., Elasri, M.O., Allmendinger, S.D., Beenken, K.E., Skinner, R.A., Thomas, J.R., and  
643 Smeltzer, M.S. (2003). Role of *sarA* in the pathogenesis of *Staphylococcus aureus*  
644 musculoskeletal infection. *Infect Immun* *71*, 516-523.
- 645 Branda, S.S., Gonzalez-Pastor, J.E., Ben-Yehuda, S., Losick, R., and Kolter, R. (2001). Fruiting  
646 body formation by *Bacillus subtilis*. *Proc Natl Acad Sci U S A* *98*, 11621-11626.
- 647 Bubeck Wardenburg, J., and Schneewind, O. (2008). Vaccine protection against *Staphylococcus*  
648 *aureus* pneumonia. *The Journal of experimental medicine* *205*, 287-294.
- 649 Bubeck Wardenburg, J., Williams, W.A., and Missiakas, D. (2006). Host defenses against  
650 *Staphylococcus aureus* infection require recognition of bacterial lipoproteins. *Proc Natl Acad Sci*  
651 *U S A* *103*, 13831-13836.
- 652 Bunce, C., Wheeler, L., Reed, G., Musser, J., and Barg, N. (1992). Murine model of cutaneous  
653 infection with gram-positive cocci. *Infect Immun* *60*, 2636-2640.
- 654 Burkholder, P.R., and Giles, N.H., Jr. (1947). Induced biochemical mutations in *Bacillus subtilis*.  
655 *Am J Bot* *34*, 345-348.
- 656 Bustin, S.A., Benes, V., Garson, J.A., Hellemans, J., Huggett, J., Kubista, M., Mueller, R., Nolan,  
657 T., Pfaffl, M.W., Shipley, G.L., *et al.* (2009). The MIQE guidelines: minimum information for  
658 publication of quantitative real-time PCR experiments. *Clin Chem* *55*, 611-622.
- 659 Cafiso, V., Bertuccio, T., Spina, D., Purrello, S., Campanile, F., Di Pietro, C., Purrello, M., and  
660 Stefani, S. (2012). Modulating activity of vancomycin and daptomycin on the expression of  
661 autolysis cell-wall turnover and membrane charge genes in hVISA and VISA strains. *PLoS One*  
662 *7*, e29573.
- 663 Camacho, C., Coulouris, G., Avagyan, V., Ma, N., Papadopoulos, J., Bealer, K., and Madden,  
664 T.L. (2009). BLAST+: architecture and applications. *BMC Bioinformatics* *10*, 421.
- 665 Cao, M., and Helmann, J.D. (2004). The *Bacillus subtilis* extracytoplasmic-function sigmaX factor  
666 regulates modification of the cell envelope and resistance to cationic antimicrobial peptides. *J*  
667 *Bacteriol* *186*, 1136-1146.
- 668 Chen, J., Feng, G., Guo, Q., Wardenburg, J.B., Lin, S., Inoshima, I., Deaton, R., Yuan, J.X.,  
669 Garcia, J.G., Machado, R.F., *et al.* (2013). Transcriptional events during the recovery from  
670 MRSA lung infection: a mouse pneumonia model. *PLoS One* *8*, e70176.
- 671 Cheng, A.G., McAdow, M., Kim, H.K., Bae, T., Missiakas, D.M., and Schneewind, O. (2010).  
672 Contribution of coagulases towards *Staphylococcus aureus* disease and protective immunity.  
673 *PLoS Pathog* *6*, e1001036.
- 674 Cohn, Z.A. (1962). Determinants of infection in the peritoneal cavity. II. Factors influencing the  
675 fate of *Staphylococcus aureus* in the mouse. *Yale J Biol Med* *35*, 29-47.

676 Cui, L., Isii, T., Fukuda, M., Ochiai, T., Neoh, H.M., Camargo, I.L., Watanabe, Y., Shoji, M.,  
677 Hishinuma, T., and Hiramatsu, K. (2010). An RpoB mutation confers dual heteroresistance to  
678 daptomycin and vancomycin in *Staphylococcus aureus*. *Antimicrob Agents Chemother* 54, 5222-  
679 5233.

680 Cui, L., Iwamoto, A., Lian, J.Q., Neoh, H.M., Maruyama, T., Horikawa, Y., and Hiramatsu, K.  
681 (2006). Novel mechanism of antibiotic resistance originating in vancomycin-intermediate  
682 *Staphylococcus aureus*. *Antimicrob Agents Chemother* 50, 428-438.

683 Daly, K.M., Upton, M., Sandiford, S.K., Draper, L.A., Wescombe, P.A., Jack, R.W., O'Connor,  
684 P.M., Rossney, A., Gotz, F., Hill, C., *et al.* (2010). Production of the Bsa lantibiotic by community-  
685 acquired *Staphylococcus aureus* strains. *J Bacteriol* 192, 1131-1142.

686 Darling, A.C., Mau, B., Blattner, F.R., and Perna, N.T. (2004). Mauve: multiple alignment of  
687 conserved genomic sequence with rearrangements. *Genome Res* 14, 1394-1403.

688 Darling, A.E., Tritt, A., Eisen, J.A., and Facciotti, M.T. (2011). Mauve assembly metrics.  
689 *Bioinformatics* 27, 2756-2757.

690 Daum, R.S., Gupta, S., Sabbagh, R., and Milewski, W.M. (1992). Characterization of  
691 *Staphylococcus aureus* isolates with decreased susceptibility to vancomycin and teicoplanin:  
692 isolation and purification of a constitutively produced protein associated with decreased  
693 susceptibility. *J Infect Dis* 166, 1066-1072.

694 Dugar, G., Herbig, A., Forstner, K.U., Heidrich, N., Reinhardt, R., Nieselt, K., and Sharma, C.M.  
695 (2013). High-Resolution Transcriptome Maps Reveal Strain-Specific Regulatory Features of  
696 Multiple *Campylobacter jejuni* Isolates. *PLoS Genet* 9, e1003495.

697 Dye, E.S., and Kapral, F.A. (1981). Survival of *Staphylococcus aureus* in intraperitoneal  
698 abscesses. *J Med Microbiol* 14, 185-194.

699 Dyke, K.G. (1969). Penicillinase production and intrinsic resistance to penicillins in methicillin-  
700 resistant cultures of *Staphylococcus aureus*. *J Med Microbiol* 2, 261-278.

701 Easmon, C.S., and Glynn, A.A. (1975). Cell-mediated immune responses in *Staphylococcus*  
702 *aureus* infections in mice. *Immunology* 29, 75-85.

703 Edgar, R., Domrachev, M., and Lash, A.E. (2002). Gene Expression Omnibus: NCBI gene  
704 expression and hybridization array data repository. *Nucleic Acids Res* 30, 207-210.

705 Ekstedt, R.D., and Yoshida, K. (1969). Immunity to staphylococcal infection in mice: effect of  
706 living versus killed vaccine, role of circulating antibody, and induction of protection-inducing  
707 antigen(s) in vitro. *J Bacteriol* 100, 745-750.

708 Foletti, D., Strop, P., Shaughnessy, L., Hasa-Moreno, A., Casas, M.G., Russell, M., Bee, C., Wu,  
709 S., Pham, A., Zeng, Z., *et al.* (2013). Mechanism of action and in vivo efficacy of a human-  
710 derived antibody against *Staphylococcus aureus* alpha-hemolysin. *J Mol Biol* 425, 1641-1654.

711 Ford, C.W., Hamel, J.C., Stapert, D., and Yancey, R.J. (1989). Establishment of an experimental  
712 model of a *Staphylococcus aureus* abscess in mice by use of dextran and gelatin microcarriers. *J*  
713 *Med Microbiol* 28, 259-266.

714 Geiger, T., Francois, P., Liebeke, M., Fraunholz, M., Goerke, C., Krismer, B., Schrenzel, J., Lalk,  
715 M., and Wolz, C. (2012). The Stringent Response of *Staphylococcus aureus* and Its Impact on  
716 Survival after Phagocytosis through the Induction of Intracellular PSMs Expression. *PLoS Pathog*  
717 8, e1003016.

- 718 Georgopoulos, A., Feistauer, S.M., Graninger, W., Pflieger, S., and Georgopoulos, M. (1992).  
719 Antibacterial activity of sparfloxacin against experimental renal infections in mice. *Antimicrob*  
720 *Agents Chemother* 36, 505-507.
- 721 Giachino, P., Engelmann, S., and Bischoff, M. (2001). Sigma(B) activity depends on RsbU in  
722 *Staphylococcus aureus*. *J Bacteriol* 183, 1843-1852.
- 723 Gibson, G.W., Kreuser, S.C., Riley, J.M., Rosebury-Smith, W.S., Courtney, C.L., Juneau, P.L.,  
724 Hollembaek, J.M., Zhu, T., Huband, M.D., Brammer, D.W., *et al.* (2007). Development of a  
725 mouse model of induced *Staphylococcus aureus* infective endocarditis. *Comp Med* 57, 563-569.
- 726 Gotz, F. (2002). *Staphylococcus* and biofilms. *Molecular microbiology* 43, 1367-1378.
- 727 Grohs, P., Gutmann, L., Legrand, R., Schoot, B., and Mainardi, J.L. (2000). Vancomycin  
728 resistance is associated with serine-containing peptidoglycan in *Enterococcus gallinarum*. *J*  
729 *Bacteriol* 182, 6228-6232.
- 730 Hafer, C., Lin, Y., Kornblum, J., Lowy, F.D., and Uhlemann, A.C. (2012). Contribution of selected  
731 gene mutations to resistance in clinical isolates of vancomycin-intermediate *Staphylococcus*  
732 *aureus*. *Antimicrob Agents Chemother* 56, 5845-5851.
- 733 Harada, Y., Yanagihara, K., Yamada, K., Migiyama, Y., Nagaoka, K., Morinaga, Y., Nakamura,  
734 S., Imamura, Y., Hasegawa, H., Miyazaki, T., *et al.* (2013). In vivo efficacy of daptomycin against  
735 methicillin-resistant *Staphylococcus aureus* in a mouse model of hematogenous pulmonary  
736 infection. *Antimicrob Agents Chemother* 57, 2841-2844.
- 737 Hebert, G.A., and Hancock, G.A. (1985). Synergistic hemolysis exhibited by species of  
738 staphylococci. *J Clin Microbiol* 22, 409-415.
- 739 Herbert, S., Ziebandt, A.K., Ohlsen, K., Schafer, T., Hecker, M., Albrecht, D., Novick, R., and  
740 Gotz, F. (2010). Repair of global regulators in *Staphylococcus aureus* 8325 and comparative  
741 analysis with other clinical isolates. *Infect Immun* 78, 2877-2889.
- 742 Hiramatsu, K. (2001). Vancomycin-resistant *Staphylococcus aureus*: a new model of antibiotic  
743 resistance. *Lancet Infect Dis* 1, 147-155.
- 744 Hiramatsu, K., Aritaka, N., Hanaki, H., Kawasaki, S., Hosoda, Y., Hori, S., Fukuchi, Y., and  
745 Kobayashi, I. (1997). Dissemination in Japanese hospitals of strains of *Staphylococcus aureus*  
746 heterogeneously resistant to vancomycin. *Lancet* 350, 1670-1673.
- 747 Hoffmann, S., Otto, C., Kurtz, S., Sharma, C.M., Khaitovich, P., Vogel, J., Stadler, P.F., and  
748 Hackermuller, J. (2009). Fast mapping of short sequences with mismatches, insertions and  
749 deletions using index structures. *PLoS Comput Biol* 5, e1000502.
- 750 Horsburgh, M.J., Aish, J.L., White, I.J., Shaw, L., Lithgow, J.K., and Foster, S.J. (2002). sigmaB  
751 modulates virulence determinant expression and stress resistance: characterization of a  
752 functional rsbU strain derived from *Staphylococcus aureus* 8325-4. *J Bacteriol* 184, 5457-5467.
- 753 Howden, B.P., McEvoy, C.R., Allen, D.L., Chua, K., Gao, W., Harrison, P.F., Bell, J., Coombs,  
754 G., Bennett-Wood, V., Porter, J.L., *et al.* (2011). Evolution of multidrug resistance during  
755 *Staphylococcus aureus* infection involves mutation of the essential two component regulator  
756 WalkR. *PLoS Pathog* 7, e1002359.
- 757 Hu, D.L., Narita, K., Hyodo, M., Hayakawa, Y., Nakane, A., and Karaolis, D.K. (2009). c-di-GMP  
758 as a vaccine adjuvant enhances protection against systemic methicillin-resistant *Staphylococcus*  
759 *aureus* (MRSA) infection. *Vaccine* 27, 4867-4873.

760 Inose, Y., Takeshita, S.L., Hidaka, T., Higashide, M., Maruyama, A., Hayashi, H., Morikawa, K.,  
761 and Ohta, T. (2006). Genetic characterization of the natural SigB variants found in clinical  
762 isolates of *Staphylococcus aureus*. *J Gen Appl Microbiol* 52, 259-271.

763 Ito, T., Katayama, Y., and Hiramatsu, K. (1999). Cloning and nucleotide sequence determination  
764 of the entire mec DNA of pre-methicillin-resistant *Staphylococcus aureus* N315. *Antimicrob*  
765 *Agents Chemother* 43, 1449-1458.

766 Jabes, D., Brunati, C., Candiani, G., Riva, S., Romano, G., and Donadio, S. (2011). Efficacy of  
767 the new lantibiotic NAI-107 in experimental infections induced by multidrug-resistant Gram-  
768 positive pathogens. *Antimicrob Agents Chemother* 55, 1671-1676.

769 Jacqueline, C., Broquet, A., Roquilly, A., Davieau, M., Caillon, J., Altare, F., Potel, G., and  
770 Asehounne, K. (2014). Linezolid Dampens Neutrophil-Mediated Inflammation in Methicillin-  
771 Resistant *Staphylococcus aureus*-Induced Pneumonia and Protects the Lung of Associated  
772 Damages. *J Infect Dis*.

773 Kapral, F.A. (1966). Clumping of *Staphylococcus aureus* in the peritoneal cavity of mice. *J*  
774 *Bacteriol* 92, 1188-1195.

775 Kapral, F.A., Godwin, J.R., and Dye, E.S. (1980). Formation of intraperitoneal abscesses by  
776 *Staphylococcus aureus*. *Infect Immun* 30, 204-211.

777 Karlsson-Kanth, A., Tegmark-Wisell, K., Arvidson, S., and Oscarsson, J. (2006). Natural human  
778 isolates of *Staphylococcus aureus* selected for high production of proteases and alpha-  
779 hemolysin are sigmaB deficient. *Int J Med Microbiol* 296, 229-236.

780 Kazakova, S.V., Hageman, J.C., Matava, M., Srinivasan, A., Phelan, L., Garfinkel, B., Boo, T.,  
781 McAllister, S., Anderson, J., Jensen, B., *et al.* (2005). A clone of methicillin-resistant  
782 *Staphylococcus aureus* among professional football players. *N Engl J Med* 352, 468-475.

783 Kim, H.K., Emolo, C., DeDent, A.C., Falugi, F., Missiakas, D.M., and Schneewind, O. (2012).  
784 Protein A-specific monoclonal antibodies and prevention of *Staphylococcus aureus* disease in  
785 mice. *Infect Immun* 80, 3460-3470.

786 Kim, H.K., Kim, H.Y., Schneewind, O., and Missiakas, D. (2011). Identifying protective antigens  
787 of *Staphylococcus aureus*, a pathogen that suppresses host immune responses. *FASEB J* 25,  
788 3605-3612.

789 King-Scott, J., Konarev, P.V., Panjikar, S., Jordanova, R., Svergun, D.I., and Tucker, P.A.  
790 (2011). Structural characterization of the multidomain regulatory protein Rv1364c from  
791 *Mycobacterium tuberculosis*. *Structure* 19, 56-69.

792 Kokai-Kun, J.F., Chanturiya, T., and Mond, J.J. (2007). Lysostaphin as a treatment for systemic  
793 *Staphylococcus aureus* infection in a mouse model. *J Antimicrob Chemother* 60, 1051-1059.

794 Kornblum, J., Kreiswirth, B., Projan, S. J. Ross, H and Novick, R. P. (1990). Agr: a polycistronic  
795 locus regulating exoprotein synthesis in *Staphylococcus aureus*. *Molecular biology of the*  
796 *staphylococci*, R.P. Novick, ed. (New York: VCH Publishers).

797 Krismer, B., Liebeke, M., Janek, D., Nega, M., Rautenberg, M., Hornig, G., Unger, C.,  
798 Weidenmaier, C., Lalk, M., and Peschel, A. (2014). Nutrient limitation governs *Staphylococcus*  
799 *aureus* metabolism and niche adaptation in the human nose. *PLoS Pathog* 10, e1003862.

800 Lipinski, B., Hawiger, J., and Jeljaszewicz, J. (1967). Staphylococcal clumping with soluble fibrin  
801 monomer complexes. *J Exp Med* 126, 979-988.

802 Lobo, M.C., and Mandell, G.L. (1972). Treatment of experimental staphylococcal infection with  
803 rifampin. *Antimicrob Agents Chemother* 2, 195-200.

804 Lopez, D., Vlamakis, H., Losick, R., and Kolter, R. (2009). Paracrine signaling in a bacterium.  
805 *Genes Dev* 23, 1631-1638.

806 Magnuson, R., Solomon, J., and Grossman, A.D. (1994). Biochemical and genetic  
807 characterization of a competence pheromone from *B. subtilis*. *Cell* 77, 207-216.

808 Mainiero, M., Goerke, C., Geiger, T., Gonser, C., Herbert, S., and Wolz, C. (2010). Differential  
809 target gene activation by the *Staphylococcus aureus* two-component system saeRS. *J Bacteriol*  
810 192, 613-623.

811 Marincola, G., Schafer, T., Behler, J., Bernhardt, J., Ohlsen, K., Goerke, C., and Wolz, C. (2012).  
812 RNase Y of *Staphylococcus aureus* and its role in the activation of virulence genes. *Mol*  
813 *Microbiol* 85, 817-832.

814 Mariotti, P., Malito, E., Biancucci, M., Lo Surdo, P., Mishra, R.P., Nardi-Dei, V., Savino, S.,  
815 Nissum, M., Spraggon, G., Grandi, G., *et al.* (2013). Structural and functional characterization of  
816 the *Staphylococcus aureus* virulence factor and vaccine candidate FhuD2. *Biochem J* 449, 683-  
817 693.

818 McAdam, P.R., Holmes, A., Templeton, K.E., and Fitzgerald, J.R. (2011). Adaptive evolution of  
819 *Staphylococcus aureus* during chronic endobronchial infection of a cystic fibrosis patient. *PLoS*  
820 *One* 6, e24301.

821 McAdow, M., DeDent, A.C., Emolo, C., Cheng, A.G., Kreiswirth, B.N., Missiakas, D.M., and  
822 Schneewind, O. (2012). Coagulases as determinants of protective immune responses against  
823 *Staphylococcus aureus*. *Infect Immun* 80, 3389-3398.

824 McAdow, M., Kim, H.K., Dedent, A.C., Hendrickx, A.P., Schneewind, O., and Missiakas, D.M.  
825 (2011). Preventing *Staphylococcus aureus* sepsis through the inhibition of its agglutination in  
826 blood. *PLoS Pathog* 7, e1002307.

827 McDougal, L.K., Steward, C.D., Killgore, G.E., Chaitram, J.M., McAllister, S.K., and Tenover,  
828 F.C. (2003). Pulsed-field gel electrophoresis typing of oxacillin-resistant *Staphylococcus aureus*  
829 isolates from the United States: establishing a national database. *J Clin Microbiol* 41, 5113-5120.

830 McKenney, D., Pouliot, K.L., Wang, Y., Murthy, V., Ulrich, M., Doring, G., Lee, J.C., Goldmann,  
831 D.A., and Pier, G.B. (1999). Broadly protective vaccine for *Staphylococcus aureus* based on an  
832 in vivo-expressed antigen. *Science* 284, 1523-1527.

833 Mishra, N.N., Yang, S.J., Sawa, A., Rubio, A., Nast, C.C., Yeaman, M.R., and Bayer, A.S.  
834 (2009). Analysis of cell membrane characteristics of in vitro-selected daptomycin-resistant strains  
835 of methicillin-resistant *Staphylococcus aureus*. *Antimicrob Agents Chemother* 53, 2312-2318.

836 Mitchell, G., Fugere, A., Pepin Gaudreau, K., Brouillette, E., Frost, E.H., Cantin, A.M., and  
837 Malouin, F. (2013). SigB is a dominant regulator of virulence in *Staphylococcus aureus* small-  
838 colony variants. *PLoS One* 8, e65018.

839 Miyazaki, E., Chen, J.M., Ko, C., and Bishai, W.R. (1999). The *Staphylococcus aureus* rsbW  
840 (orf159) gene encodes an anti-sigma factor of SigB. *J Bacteriol* 181, 2846-2851.

841 Nakano, M.M., Xia, L.A., and Zuber, P. (1991). Transcription initiation region of the *srfA* operon,  
842 which is controlled by the comP-comA signal transduction system in *Bacillus subtilis*. *J Bacteriol*  
843 173, 5487-5493.

844 Novick, R. (1967). Properties of a cryptic high-frequency transducing phage in *Staphylococcus*  
845 *aureus*. *Virology* 33, 155-166.

846 Novick, R.P., and Geisinger, E. (2008). Quorum sensing in staphylococci. *Annu Rev Genet* 42,  
847 541-564.

848 O'Toole, G.A., and Kolter, R. (1998). Initiation of biofilm formation in *Pseudomonas fluorescens*  
849 WCS365 proceeds via multiple, convergent signalling pathways: a genetic analysis. *Mol*  
850 *Microbiol* 28, 449-461.

851 Oh, K.B., Nam, K.W., Ahn, H., Shin, J., Kim, S., and Mar, W. (2010). Therapeutic effect of (Z)-3-  
852 (2,5-dimethoxyphenyl)-2-(4-methoxyphenyl) acrylonitrile (DMMA) against *Staphylococcus aureus*  
853 infection in a murine model. *Biochem Biophys Res Commun* 396, 440-444.

854 Orth, D.S., Chugg, L.R., and Anderson, A.W. (1971). Comparison of animal sera for suitability in  
855 coagulase testing. *Appl Microbiol* 21, 420-425.

856 P, M.D., Affas, Z., Reynolds, C., Holden, M.T., Wood, S.J., Saint, S., Cockayne, A., Hill, P.J.,  
857 Dodd, C.E., Bycroft, B.W., *et al.* (2001). Structure, activity and evolution of the group I thiolactone  
858 peptide quorum-sensing system of *Staphylococcus aureus*. *Mol Microbiol* 41, 503-512.

859 Palma, M., and Cheung, A.L. (2001). sigma(B) activity in *Staphylococcus aureus* is controlled by  
860 RsbU and an additional factor(s) during bacterial growth. *Infect Immun* 69, 7858-7865.

861 Panizzi, P., Nahrendorf, M., Figueiredo, J.L., Panizzi, J., Marinelli, B., Iwamoto, Y., Keliher, E.,  
862 Maddur, A.A., Waterman, P., Kroh, H.K., *et al.* (2011). In vivo detection of *Staphylococcus*  
863 *aureus* endocarditis by targeting pathogen-specific prothrombin activation. *Nat Med* 17, 1142-  
864 1146.

865 Pelz, A., Wieland, K.P., Putzbach, K., Hentschel, P., Albert, K., and Gotz, F. (2005). Structure  
866 and biosynthesis of staphyloxanthin from *Staphylococcus aureus*. *J Biol Chem* 280, 32493-  
867 32498.

868 Perego, M., Glaser, P., Minutello, A., Strauch, M.A., Leopold, K., and Fischer, W. (1995).  
869 Incorporation of D-alanine into lipoteichoic acid and wall teichoic acid in *Bacillus subtilis*.  
870 Identification of genes and regulation. *J Biol Chem* 270, 15598-15606.

871 Pereira, P.M., Filipe, S.R., Tomasz, A., and Pinho, M.G. (2007). Fluorescence ratio imaging  
872 microscopy shows decreased access of vancomycin to cell wall synthetic sites in vancomycin-  
873 resistant *Staphylococcus aureus*. *Antimicrob Agents Chemother* 51, 3627-3633.

874 Peterson, J.D., Umayam, L.A., Dickinson, T., Hickey, E.K., and White, O. (2001). The  
875 Comprehensive Microbial Resource. *Nucleic Acids Res* 29, 123-125.

876 Piper, C., Casey, P.G., Hill, C., Cotter, P.D., and Ross, R.P. (2012). The Lantibiotic Lacticin 3147  
877 Prevents Systemic Spread of *Staphylococcus aureus* in a Murine Infection Model. *Int J Microbiol*  
878 2012, 806230.

879 Rauch, S., DeDent, A.C., Kim, H.K., Bubeck Wardenburg, J., Missiakas, D.M., and Schneewind,  
880 O. (2012). Abscess formation and alpha-hemolysin induced toxicity in a mouse model of  
881 *Staphylococcus aureus* peritoneal infection. *Infect Immun* 80, 3721-3732.

882 Reipert, A., Ehlert, K., Kast, T., and Bierbaum, G. (2003). Morphological and genetic differences  
883 in two isogenic *Staphylococcus aureus* strains with decreased susceptibilities to vancomycin.  
884 *Antimicrob Agents Chemother* 47, 568-576.

885 Reusch, R.N., Hiske, T.W., and Sadoff, H.L. (1986). Poly-beta-hydroxybutyrate membrane  
886 structure and its relationship to genetic transformability in *Escherichia coli*. *J Bacteriol* 168, 553-  
887 562.

888 Rice, P., Longden, I., and Bleasby, A. (2000). EMBOSS: the European Molecular Biology Open  
889 Software Suite. *Trends Genet* 16, 276-277.

890 Rozalska, B., and Wadstrom, T. (1993). Protective opsonic activity of antibodies against  
891 fibronectin-binding proteins (FnBPs) of *Staphylococcus aureus*. *Scand J Immunol* 37, 575-580.

892 Sader, H.S., Fritsche, T.R., and Jones, R.N. (2006). Daptomycin bactericidal activity and  
893 correlation between disk and broth microdilution method results in testing of *Staphylococcus*  
894 *aureus* strains with decreased susceptibility to vancomycin. *Antimicrob Agents Chemother* 50,  
895 2330-2336.

896 Sandberg, A., Lemaire, S., Van Bambeke, F., Tulkens, P.M., Hughes, D., von Eiff, C., and  
897 Fridmodt-Moller, N. (2011). Intra- and extracellular activities of dicloxacillin and linezolid against a  
898 clinical *Staphylococcus aureus* strain with a small-colony-variant phenotype in an in vitro model  
899 of THP-1 macrophages and an in vivo mouse peritonitis model. *Antimicrob Agents Chemother*  
900 55, 1443-1452.

901 Sande, L., Sanchez, M., Montes, J., Wolf, A.J., Morgan, M.A., Omri, A., and Liu, G.Y. (2012).  
902 Liposomal encapsulation of vancomycin improves killing of methicillin-resistant *Staphylococcus*  
903 *aureus* in a murine infection model. *J Antimicrob Chemother* 67, 2191-2194.

904 Sau, S., and Lee, C.Y. (1996). Cloning of type 8 capsule genes and analysis of gene clusters for  
905 the production of different capsular polysaccharides in *Staphylococcus aureus*. *J Bacteriol* 178,  
906 2118-2126.

907 Savage, V.J., Chopra, I., and O'Neill, A.J. (2013). Population diversification in *Staphylococcus*  
908 *aureus* biofilms may promote dissemination and persistence. *PLoS One* 8, e62513.

909 Sieradzki, K., Pinho, M.G., and Tomasz, A. (1999). Inactivated *pbp4* in highly glycopeptide-  
910 resistant laboratory mutants of *Staphylococcus aureus*. *J Biol Chem* 274, 18942-18946.

911 Sieradzki, K., and Tomasz, A. (2003). Alterations of cell wall structure and metabolism  
912 accompany reduced susceptibility to vancomycin in an isogenic series of clinical isolates of  
913 *Staphylococcus aureus*. *J Bacteriol* 185, 7103-7110.

914 Solomon, J.M., Magnuson, R., Srivastava, A., and Grossman, A.D. (1995). Convergent sensing  
915 pathways mediate response to two extracellular competence factors in *Bacillus subtilis*. *Genes*  
916 *Dev* 9, 547-558.

917 Tkaczyk, C., Hamilton, M.M., Datta, V., Yang, X.P., Hilliard, J.J., Stephens, G.L., Sadowska, A.,  
918 Hua, L., O'Day, T., Suzich, J., *et al.* (2013). *Staphylococcus aureus* alpha toxin suppresses  
919 effective innate and adaptive immune responses in a murine dermonecrosis model. *PLoS One* 8,  
920 e75103.

921 Touhami, A., Jericho, M.H., and Beveridge, T.J. (2004). Atomic force microscopy of cell growth  
922 and division in *Staphylococcus aureus*. *J Bacteriol* 186, 3286-3295.

923 Tsai, M., Ohniwa, R.L., Kato, Y., Takeshita, S.L., Ohta, T., Saito, S., Hayashi, H., and Morikawa,  
924 K. (2011). *Staphylococcus aureus* requires cardiolipin for survival under conditions of high  
925 salinity. *BMC Microbiol* 11, 13.

926 Tsao, S.M., Hsu, C.C., and Yin, M.C. (2003). Garlic extract and two diallyl sulphides inhibit  
927 methicillin-resistant *Staphylococcus aureus* infection in BALB/cA mice. *J Antimicrob Chemother*  
928 52, 974-980.

929 Tsompanidou, E., Denham, E.L., Becher, D., de Jong, A., Buist, G., van Oosten, M., Manson,  
930 W.L., Back, J.W., van Dijl, J.M., and Dreisbach, A. (2013). Distinct roles of phenol-soluble  
931 modulins in spreading of *Staphylococcus aureus* on wet surfaces. *Appl Environ Microbiol* 79,  
932 886-895.

933 Tsompanidou, E., Sibbald, M.J., Chlebowicz, M.A., Dreisbach, A., Back, J.W., van Dijl, J.M.,  
934 Buist, G., and Denham, E.L. (2011). Requirement of the *agr* locus for colony spreading of  
935 *Staphylococcus aureus*. *J Bacteriol* 193, 1267-1272.

- 936 van Sorge, N.M., Beasley, F.C., Gusarov, I., Gonzalez, D.J., von Kockritz-Blickwede, M., Anik,  
937 S., Borkowski, A.W., Dorrestein, P.C., Nudler, E., and Nizet, V. (2013). Methicillin-resistant  
938 *Staphylococcus aureus* bacterial nitric-oxide synthase affects antibiotic sensitivity and skin  
939 abscess development. *J Biol Chem* 288, 6417-6426.
- 940 van Wageningen A, S.T.a.W.D. (1998). Binding of D-serine-terminating cell-wall analogues to  
941 glycopeptide antibiotics. *Chemical communications*, 1171.
- 942 Wach, A. (1996). PCR-synthesis of marker cassettes with long flanking homology regions for  
943 gene disruptions in *S. cerevisiae*. *Yeast* 12, 259-265.
- 944 Weinandy, F., Lorenz-Baath, K., Korotkov, V.S., Bottcher, T., Sethi, S., Chakraborty, T., and  
945 Sieber, S.A. (2014). A beta-Lactone-Based Antivirulence Drug Ameliorates *Staphylococcus*  
946 *aureus* Skin Infections in Mice. *ChemMedChem* 9, 710-713.
- 947 Wieland, B., Feil, C., Gloria-Maercker, E., Thumm, G., Lechner, M., Bravo, J.M., Poralla, K., and  
948 Gotz, F. (1994). Genetic and biochemical analyses of the biosynthesis of the yellow carotenoid  
949 4,4'-diaponeurosporene of *Staphylococcus aureus*. *J Bacteriol* 176, 7719-7726.
- 950 Yarwood, J.M., and Schlievert, P.M. (2000). Oxygen and carbon dioxide regulation of toxic shock  
951 syndrome toxin 1 production by *Staphylococcus aureus* MN8. *J Clin Microbiol* 38, 1797-1803.
- 952 Yoshida, K., Takahashi, M., and Takeuchi, Y. (1969). Pseudocompact-type growth and  
953 conversion of growth types of strains of *Staphylococcus aureus* in vitro and in vivo. *J Bacteriol*  
954 100, 162-166.
- 955
