# Supplementary material
Source: PubMed Central journal article supplement (PMC4163622)

**A**  
**RsbUVW-SigB**

Previously published SNPs

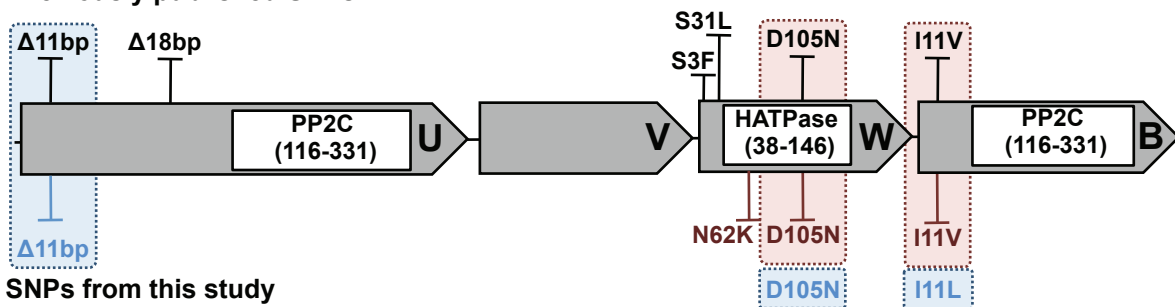**B**  
**VraRS**

Previously published SNPs

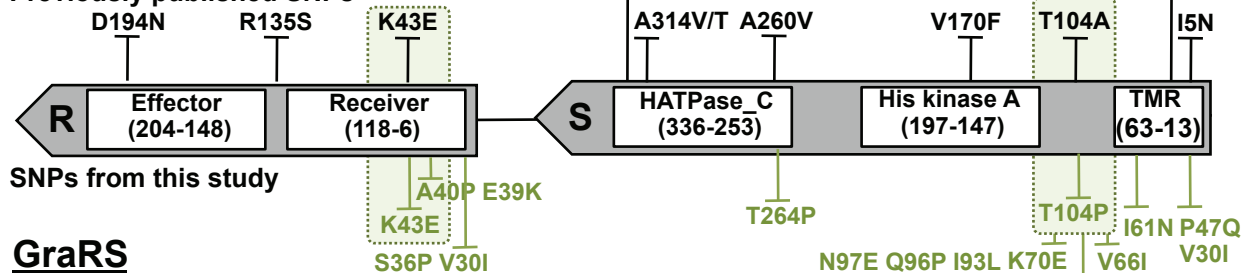**GraRS**

Previously published SNPs

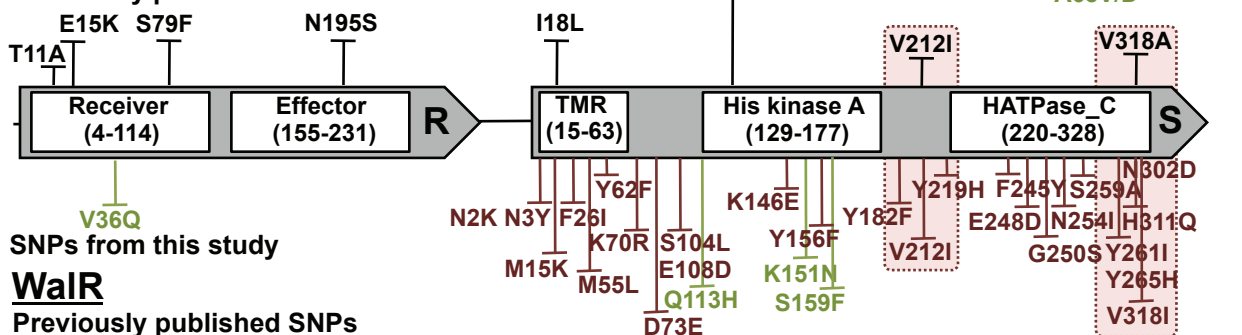**WaiR**

Previously published SNPs

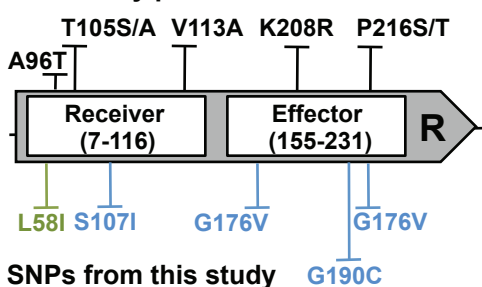**WaiK**

Previously published SNPs

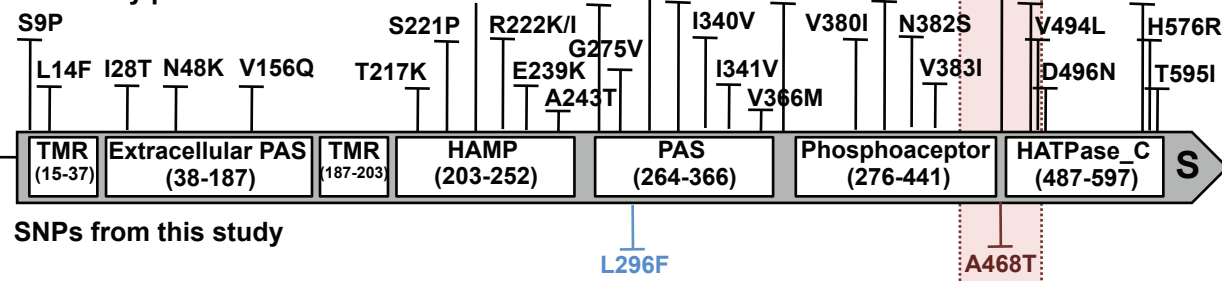

Supplement: NIHMS60204-supplement-S6.pdf [file NIHMS60204-supplement-S6.pdf]
