# Supplementary material
Source: PubMed Central journal article supplement (PMC4163622)
Supplement: NIHMS60204-supplement-S7.pdf [file NIHMS60204-supplement-S7.pdf]

A

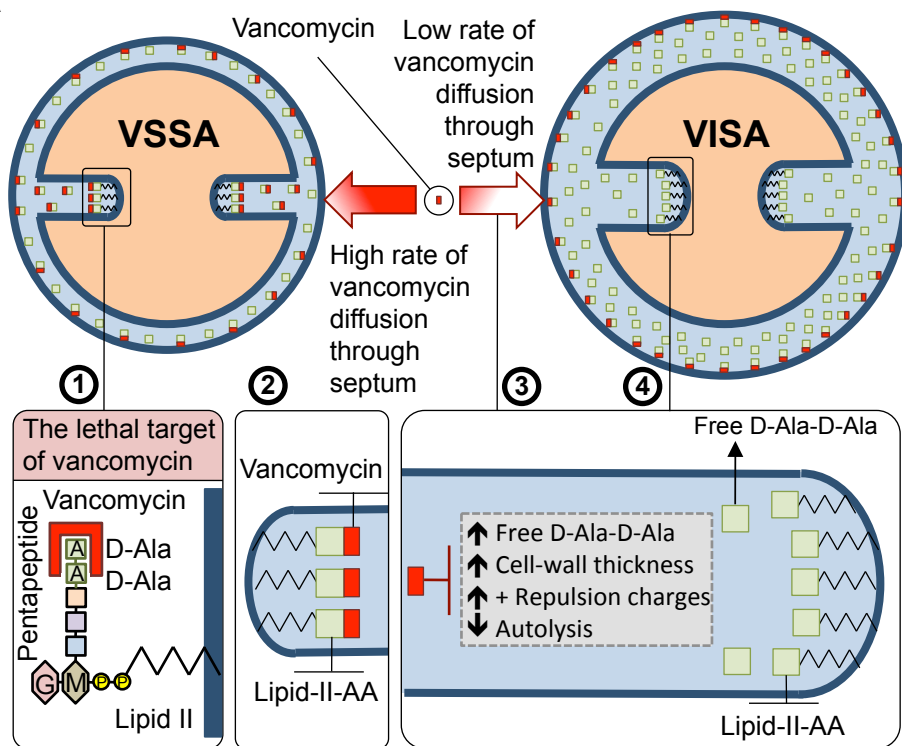

B

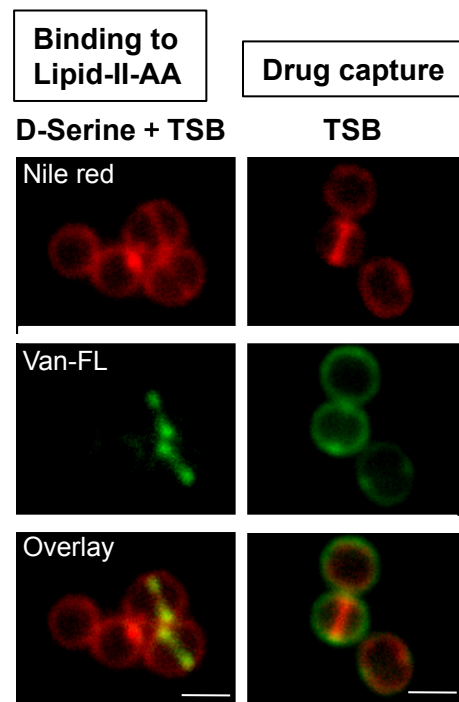

C

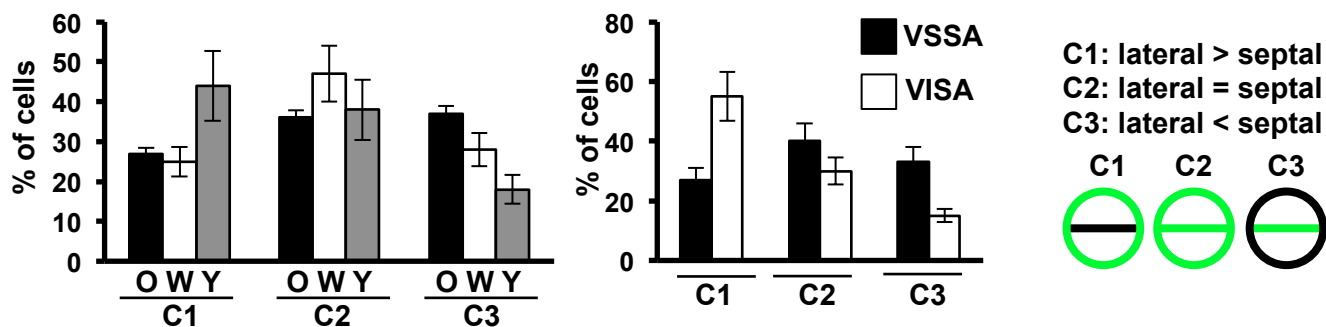

D

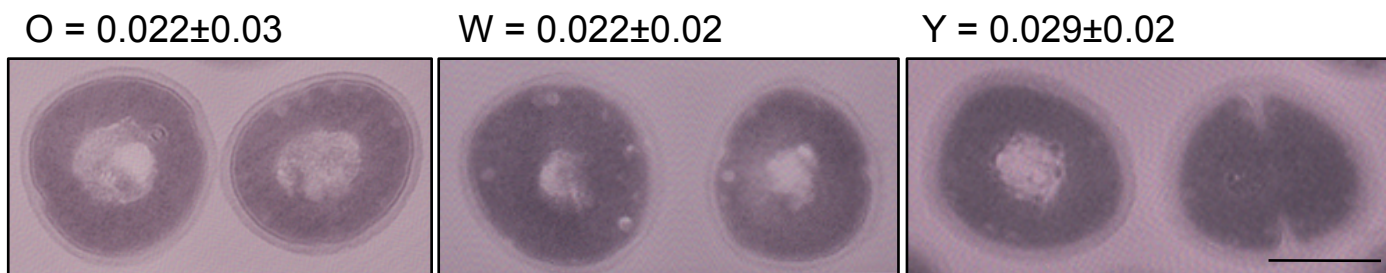

E

| Parental strain | CW (μm)    | VISA strain    | CW (μm)    | Fold increase | Reference                    |
|-----------------|------------|----------------|------------|---------------|------------------------------|
| O (this study)  | 0.022±0.03 | Y (this study) | 0.029±0.02 | 1.3           | This study                   |
| N315            | 0.021±0.06 | Mu50           | 0.035±0.04 | 1.7           | Cui <i>et al.</i> , 2006     |
| N315            | 0.021±0.06 | Mu3            | 0.026±0.02 | 1.2           | Cui <i>et al.</i> , 2006     |
| JKD6009         | 0.027±0.03 | JKD6008        | 0.031±0.02 | 1.2           | Howden <i>et al.</i> , 2011  |
| JKD6004         | 0.026±0.02 | JKD6009        | 0.030±0.02 | 1.2           | Howden <i>et al.</i> , 2011  |
| NCTC8325        | 0.026±0.04 | SA137/93A      | 0.035±0.06 | 1.3           | Reipert <i>et al.</i> , 2003 |
