# Supplementary material
Source: PubMed Central journal article supplement (PMC4163622)

A

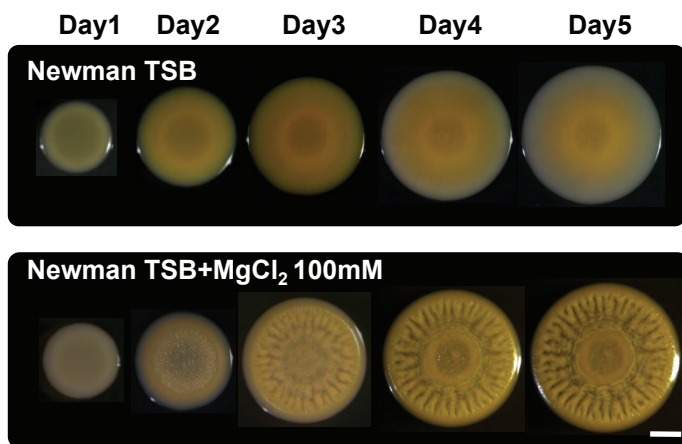

B

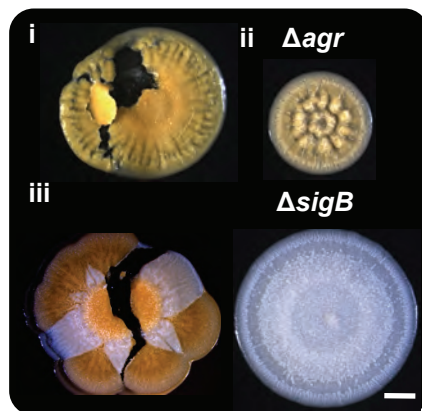

C

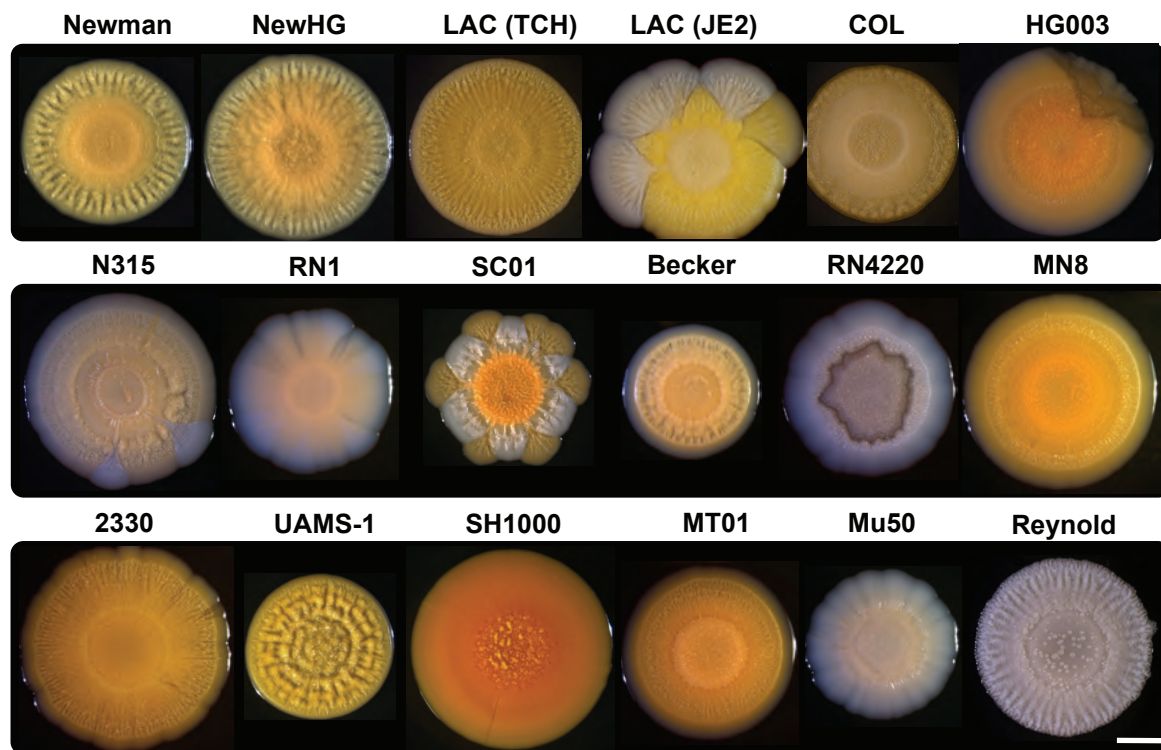

D

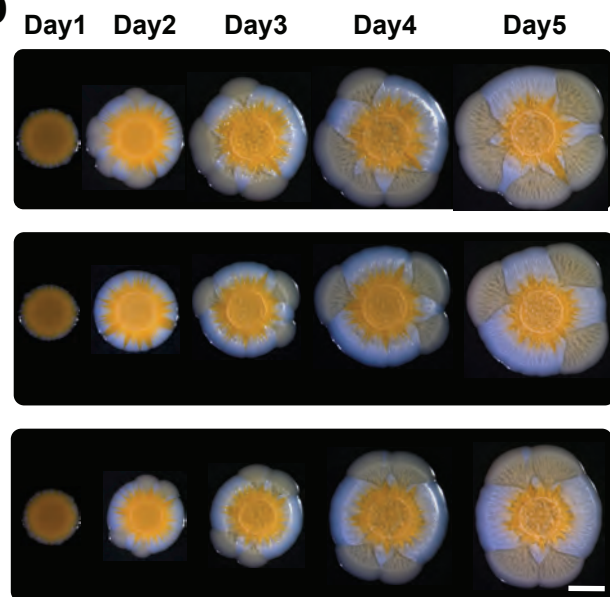

E

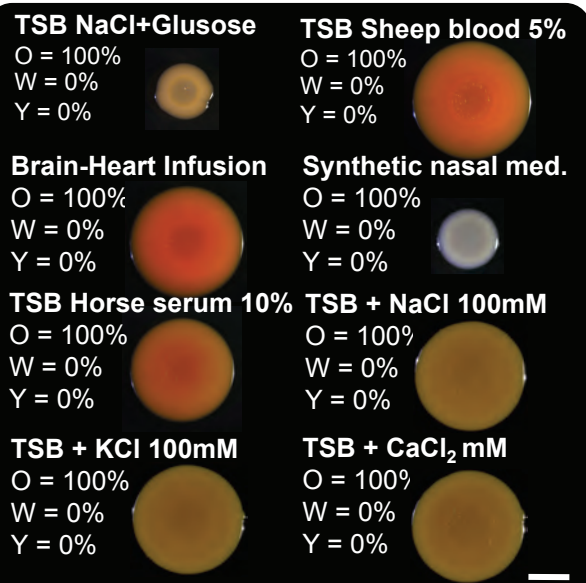

Supplement: NIHMS60204-supplement-S1.pdf [file NIHMS60204-supplement-S1.pdf]

A

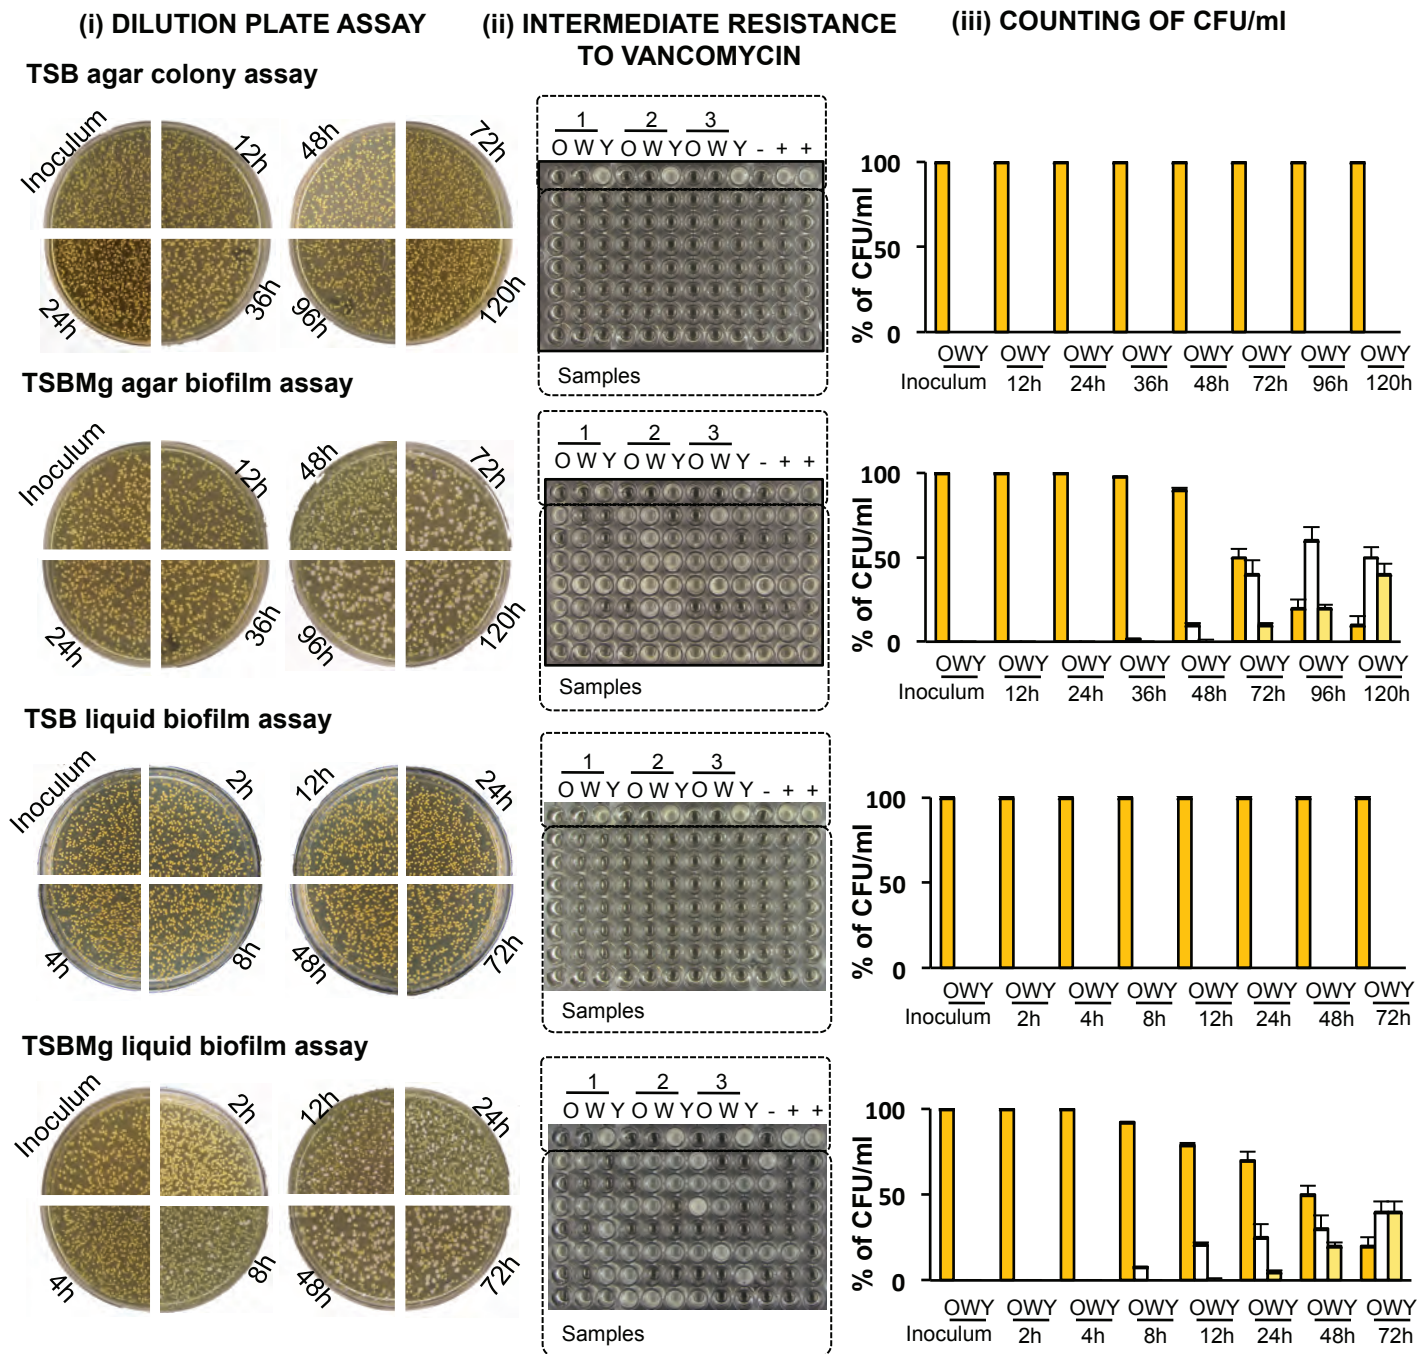

B

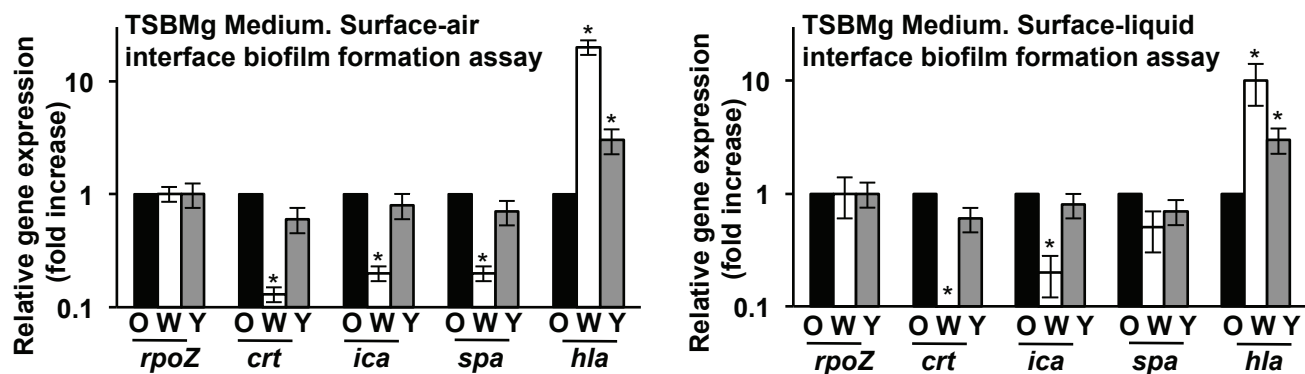

Supplement: NIHMS60204-supplement-S2.pdf [file NIHMS60204-supplement-S2.pdf]

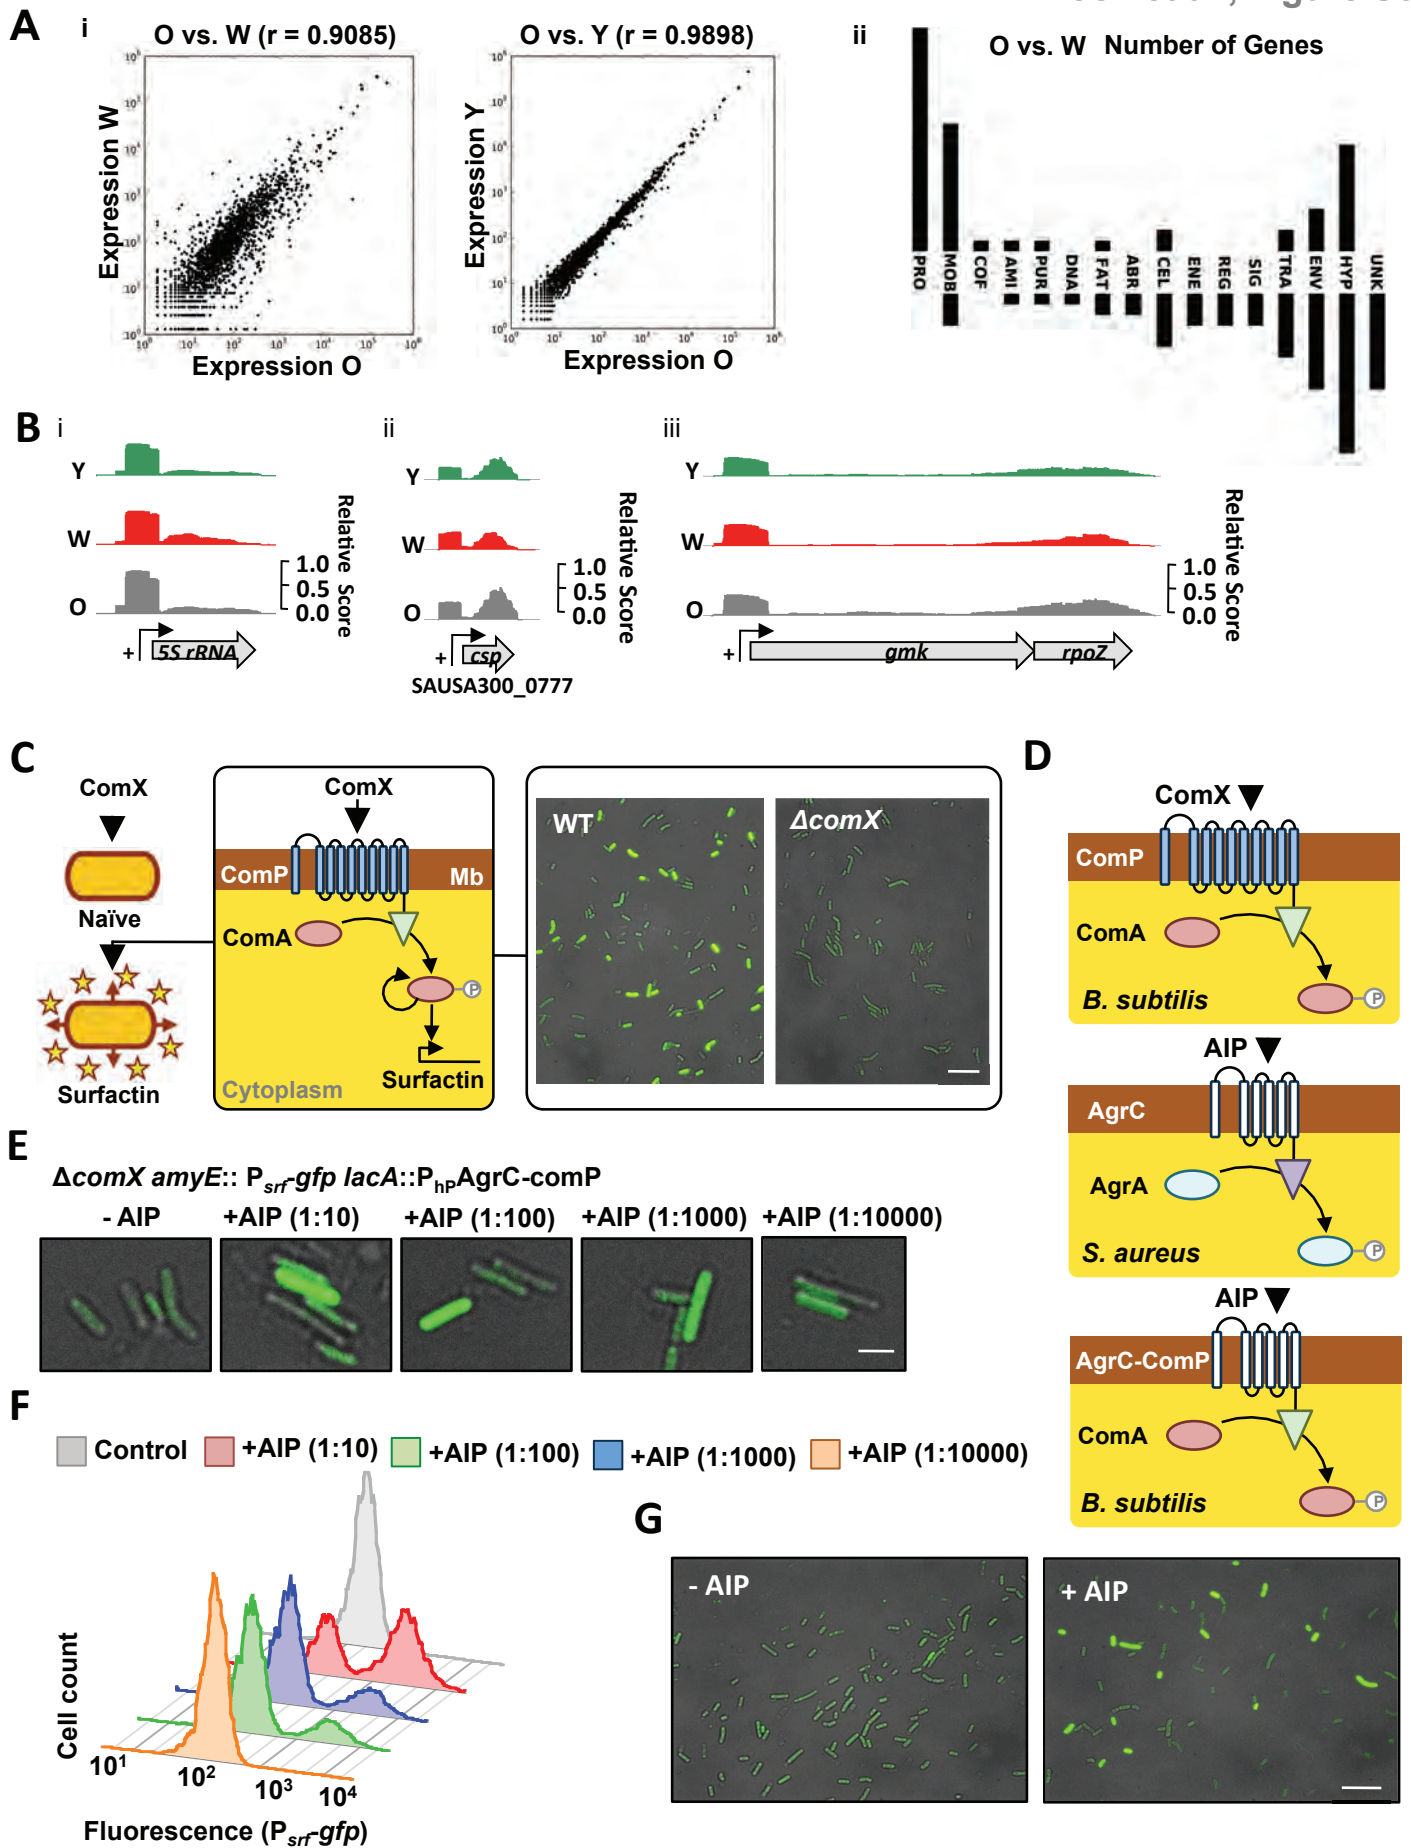

Supplement: NIHMS60204-supplement-S3.pdf [file NIHMS60204-supplement-S3.pdf]

**A**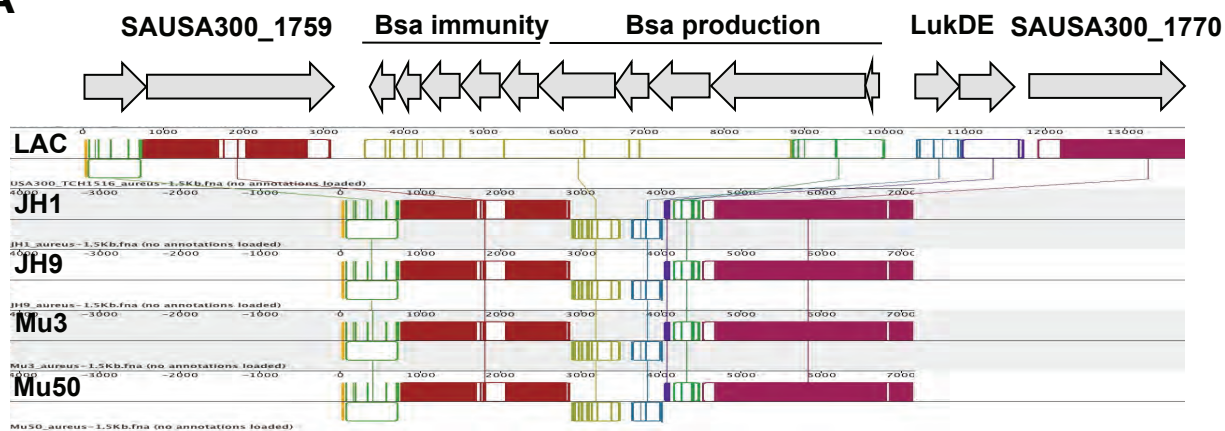**B**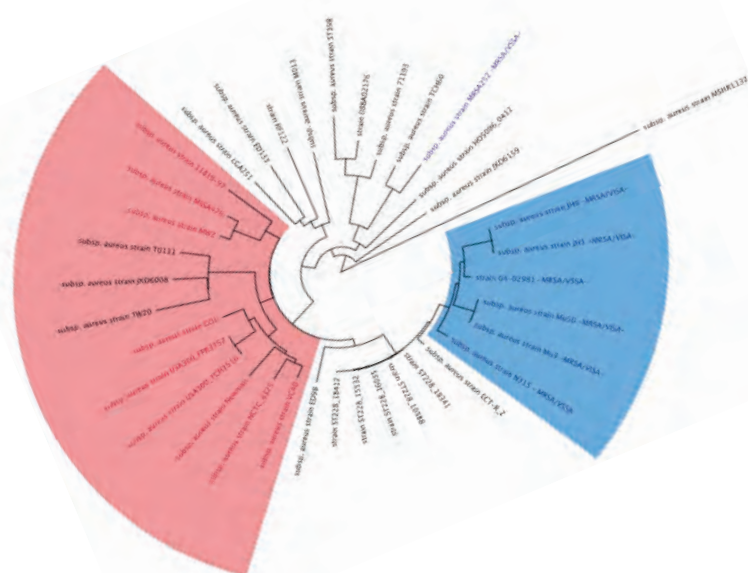**C**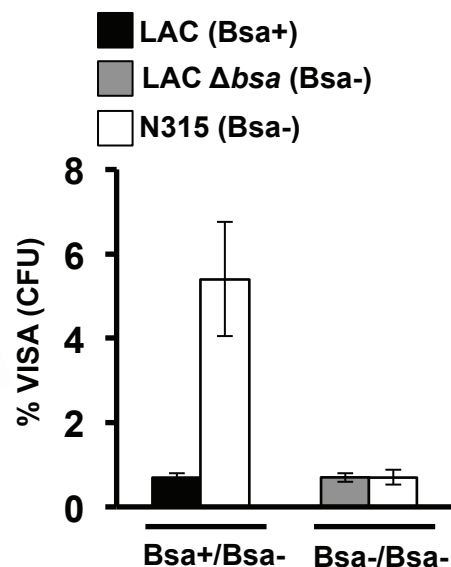**D**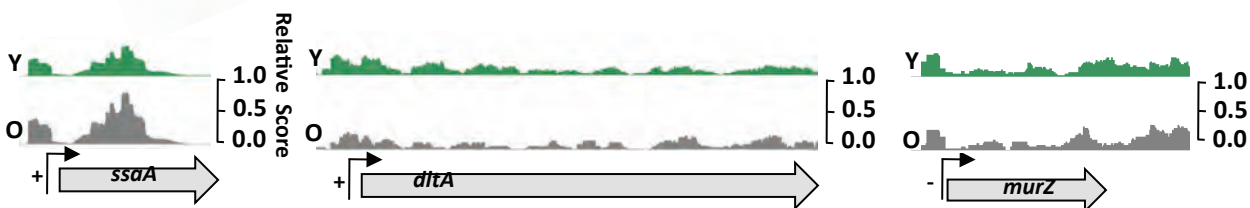**E**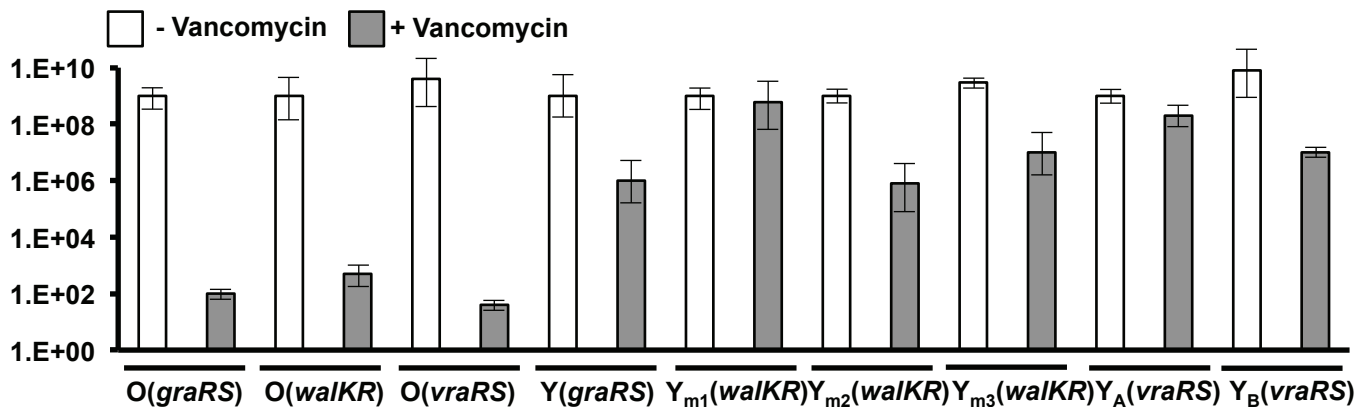

Supplement: NIHMS60204-supplement-S5.pdf [file NIHMS60204-supplement-S5.pdf]
